# Supplementary material for: Protecting group directed diversity during Mitsunobu cyclization of a carbohydrate derived diamino triol. Synthesis of novel bridged bicyclic and six-membered iminocyclitols
Source: Royal Society of Chemistry journal article supplement (doi:10.1039/c2ob27000e), 2012-11-10
Supplement: c2ob27000e.pdf [file c2ob27000e.pdf]

# **ELECTRONIC SUPPLEMENTARY INFORMATION**

## **Protecting Group Directed Diversity During Mitsunobu Cyclization of a Carbohydrate Derived Diamino Triol. Synthesis of Bridged Bicyclic and Six-membered Iminocyclitols.**

**Muthupandian Ganesan, Rahul Vilas Salunke, Nem Singh and  
Namakkal G. Ramesh\***

*Department of Chemistry, Indian Institute of Technology Delhi,  
Hauz Khas, New Delhi-110016, India.*

*ramesh@chemistry.iitd.ac.in*

## CONTENTS

### COPIES OF NMR SPECTRA

|                                                                                                                 |         |
|-----------------------------------------------------------------------------------------------------------------|---------|
| <sup>1</sup> H-NMR spectrum of compound <b>14</b>                                                               | S03     |
| <sup>13</sup> C-NMR spectrum of compound <b>14</b>                                                              | S04     |
| <sup>1</sup> H-NMR spectrum of compound <b>15</b> (in CDCl <sub>3</sub> )                                       | S05     |
| <sup>13</sup> C-NMR spectrum of compound <b>15</b> (in CDCl <sub>3</sub> )                                      | S06     |
| <sup>1</sup> H-NMR spectrum of compound <b>15</b> (in CDCl <sub>3</sub> + DMSO- <i>d</i> <sub>6</sub> )         | S07     |
| <sup>13</sup> C-NMR spectrum of compound <b>15</b> (in CDCl <sub>3</sub> + DMSO- <i>d</i> <sub>6</sub> )        | S08     |
| <sup>1</sup> H-NMR spectrum of compound <b>16</b>                                                               | S09     |
| <sup>13</sup> C-NMR spectrum of compound <b>16</b>                                                              | S10     |
| <sup>1</sup> H-NMR spectrum of compound <b>18</b>                                                               | S11     |
| <sup>13</sup> C-NMR spectrum of compound <b>18</b>                                                              | S12     |
| <sup>1</sup> H-NMR spectrum of compound <b>19</b>                                                               | S13     |
| <sup>13</sup> C-NMR spectrum of compound <b>19</b>                                                              | S14     |
| <sup>1</sup> H-NMR spectrum of compound <b>20</b>                                                               | S15     |
| <sup>13</sup> C-NMR spectrum of compound <b>20</b>                                                              | S16     |
| <sup>1</sup> H-NMR spectrum of compound <b>21</b>                                                               | S17     |
| <sup>13</sup> C-NMR spectrum of compound <b>21</b>                                                              | S18     |
| <sup>1</sup> H- <sup>1</sup> H COSY spectrum of compound <b>21</b>                                              | S19     |
| HSQC spectrum of compound <b>21</b>                                                                             | S20     |
| NOESY spectrum of compound <b>21</b>                                                                            | S21     |
| HMBC spectrum of compound <b>21</b>                                                                             | S22     |
| <sup>1</sup> H-NMR spectrum of compound <b>22</b>                                                               | S23     |
| <sup>13</sup> C-NMR spectrum of compound <b>22</b>                                                              | S24     |
| <sup>1</sup> H-NMR spectrum of compound <b>23</b>                                                               | S25     |
| <sup>13</sup> C-NMR spectrum of compound <b>23</b>                                                              | S26     |
| <sup>1</sup> H-NMR spectrum of compound <b>30</b>                                                               | S27     |
| <sup>13</sup> C-NMR spectrum of compound <b>30</b>                                                              | S28     |
| <sup>1</sup> H-NMR spectrum of compound <b>31</b>                                                               | S29     |
| <sup>13</sup> C-NMR spectrum of compound <b>31</b>                                                              | S30     |
| <sup>1</sup> H-NMR spectrum of compound <b>13</b>                                                               | S31     |
| <sup>13</sup> C-NMR spectrum of compound <b>13</b>                                                              | S32     |
| <sup>1</sup> H-NMR spectrum of compound <b>33</b>                                                               | S33     |
| <sup>13</sup> C-NMR spectrum of compound <b>33</b>                                                              | S34     |
| Energy values obtained from AM1 calculations for compounds <b>18</b> and <b>32</b><br>for various conformations | S35-S42 |

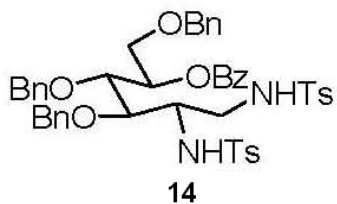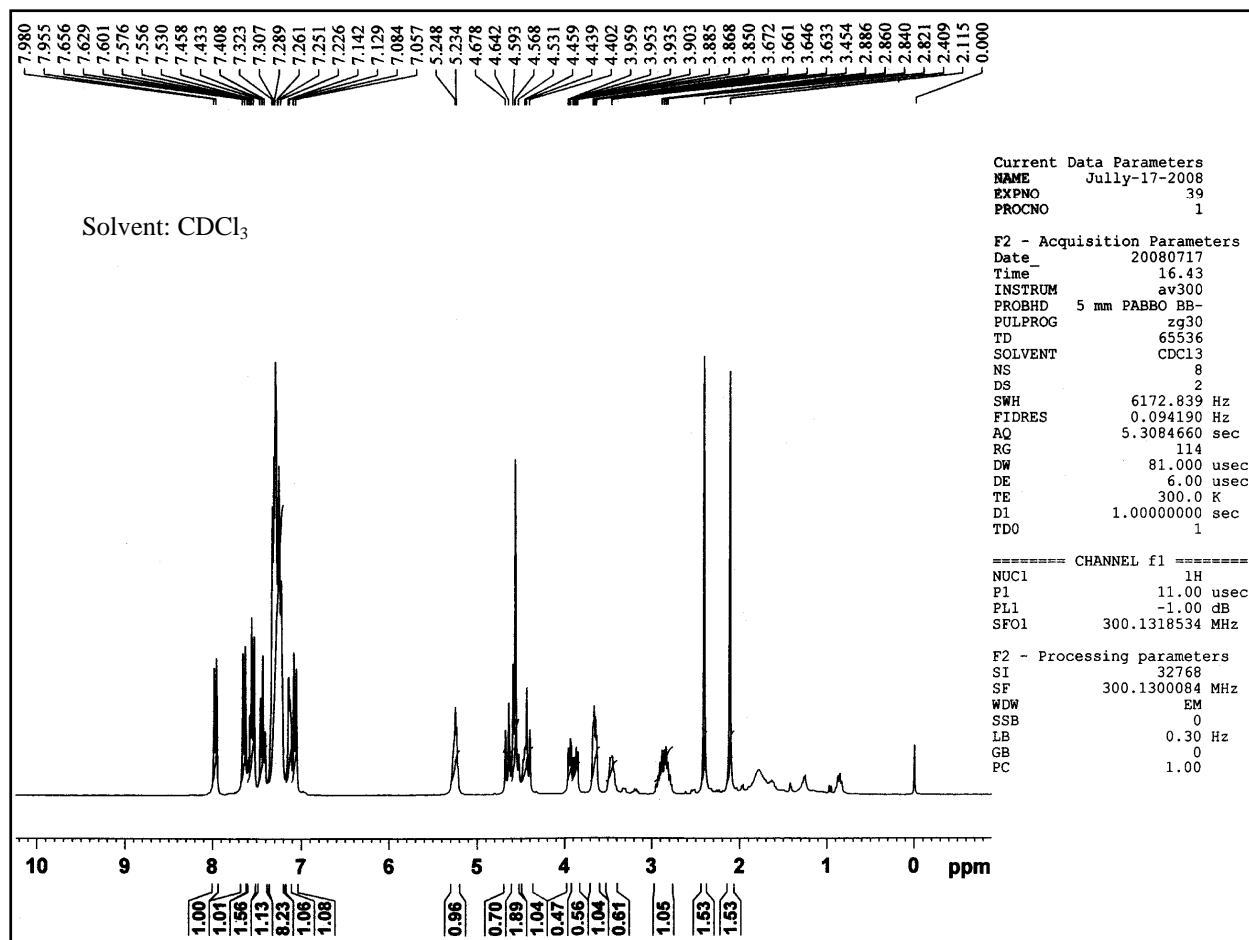

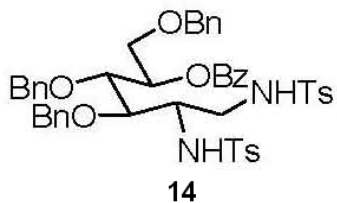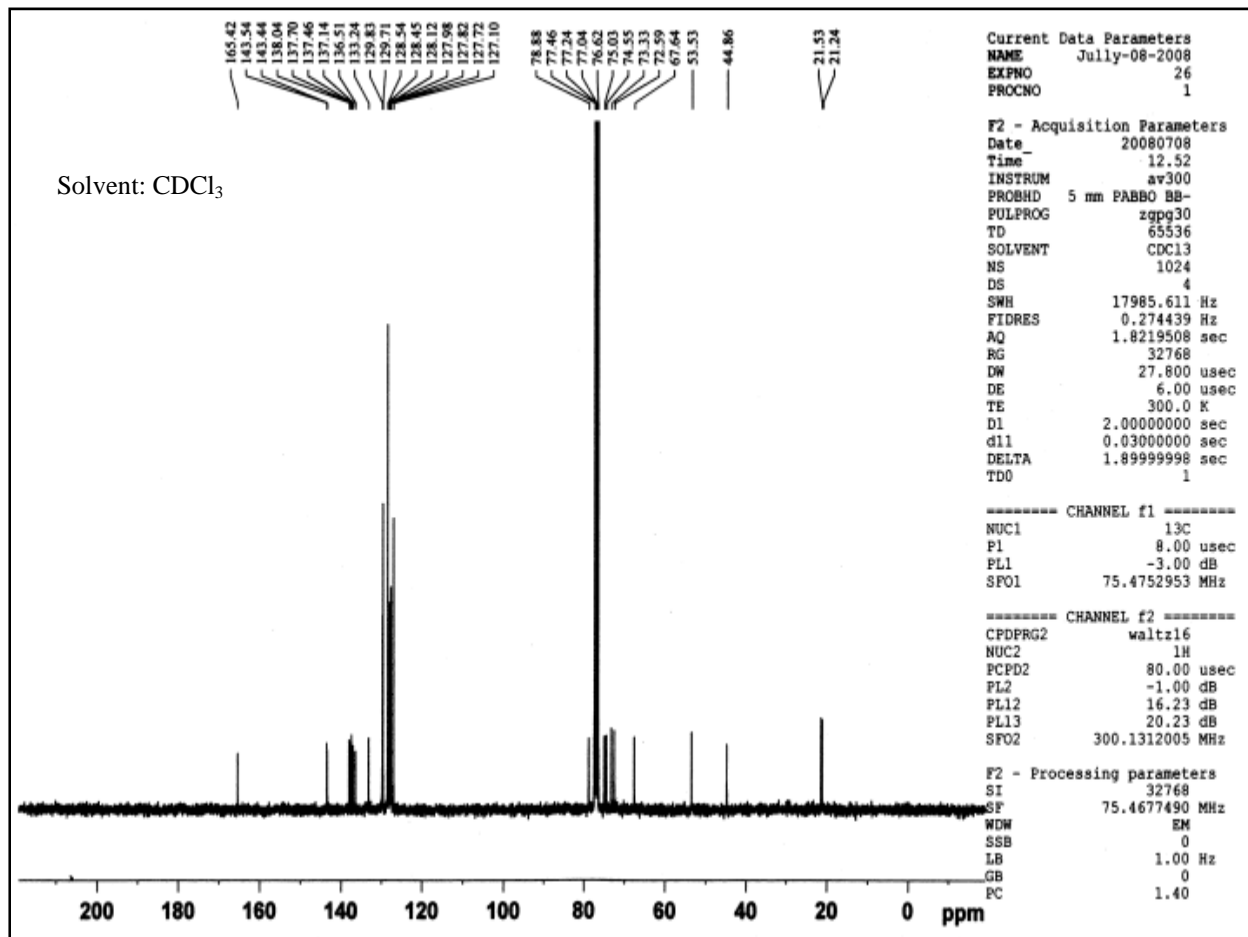

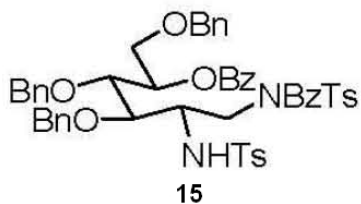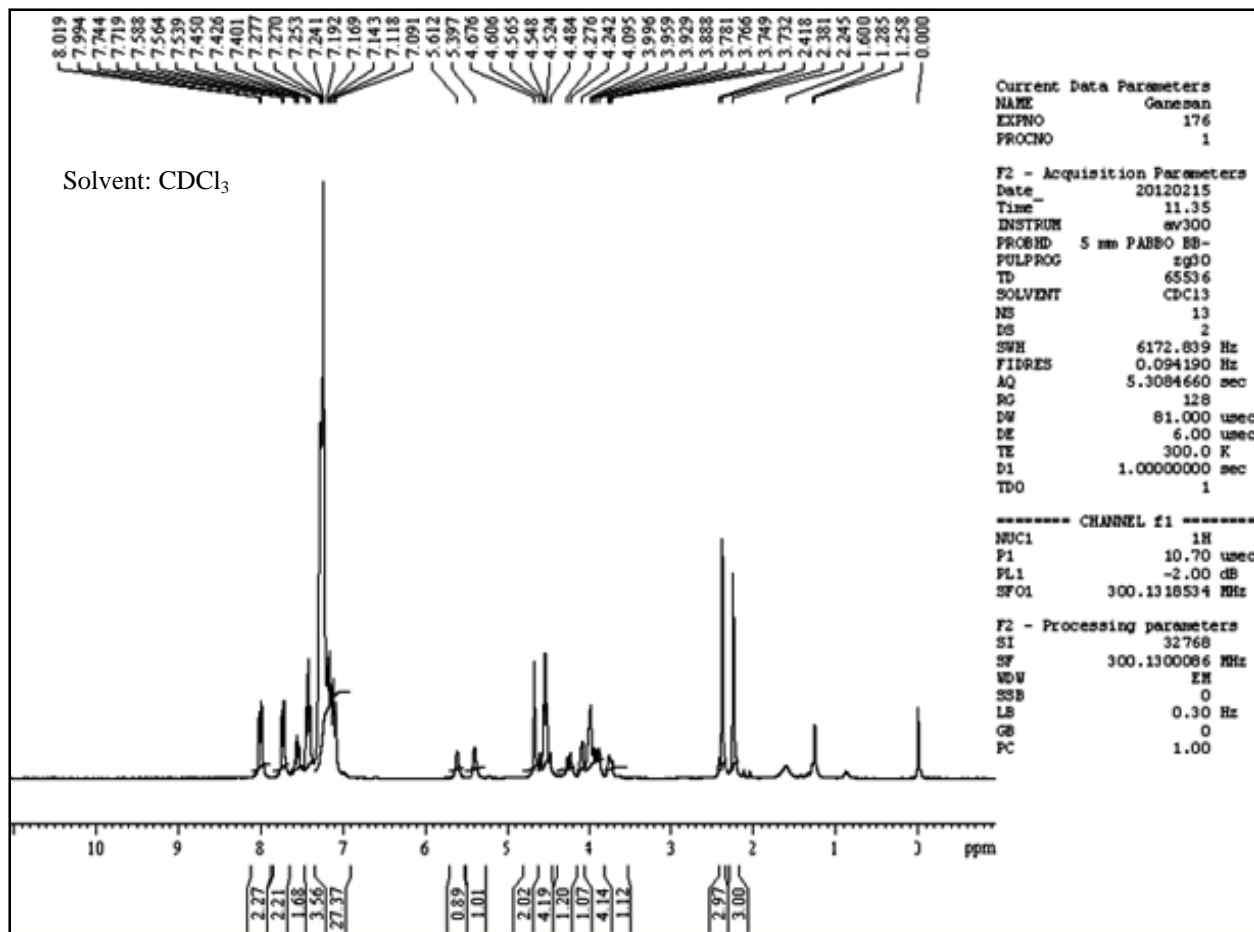

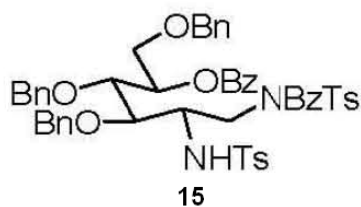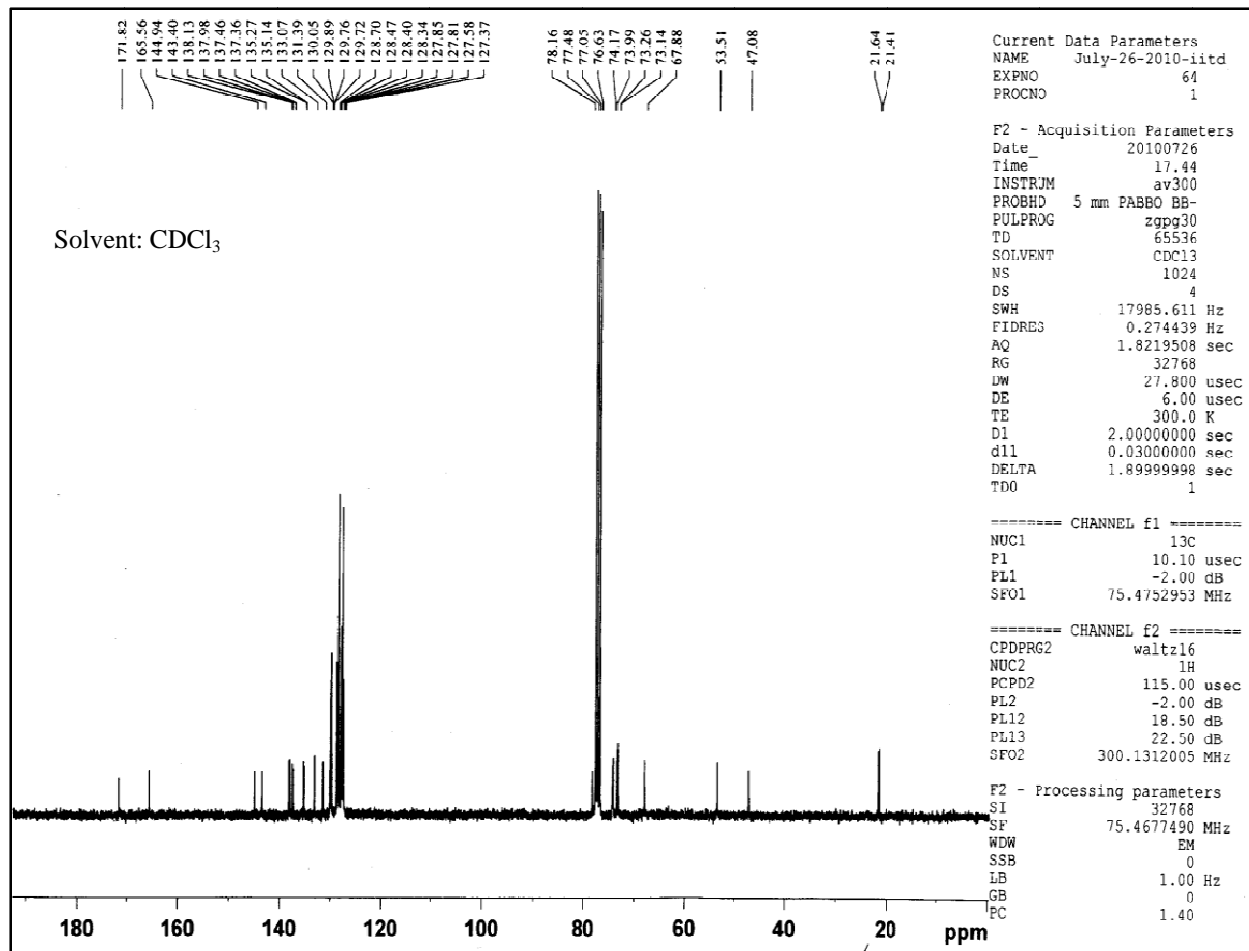

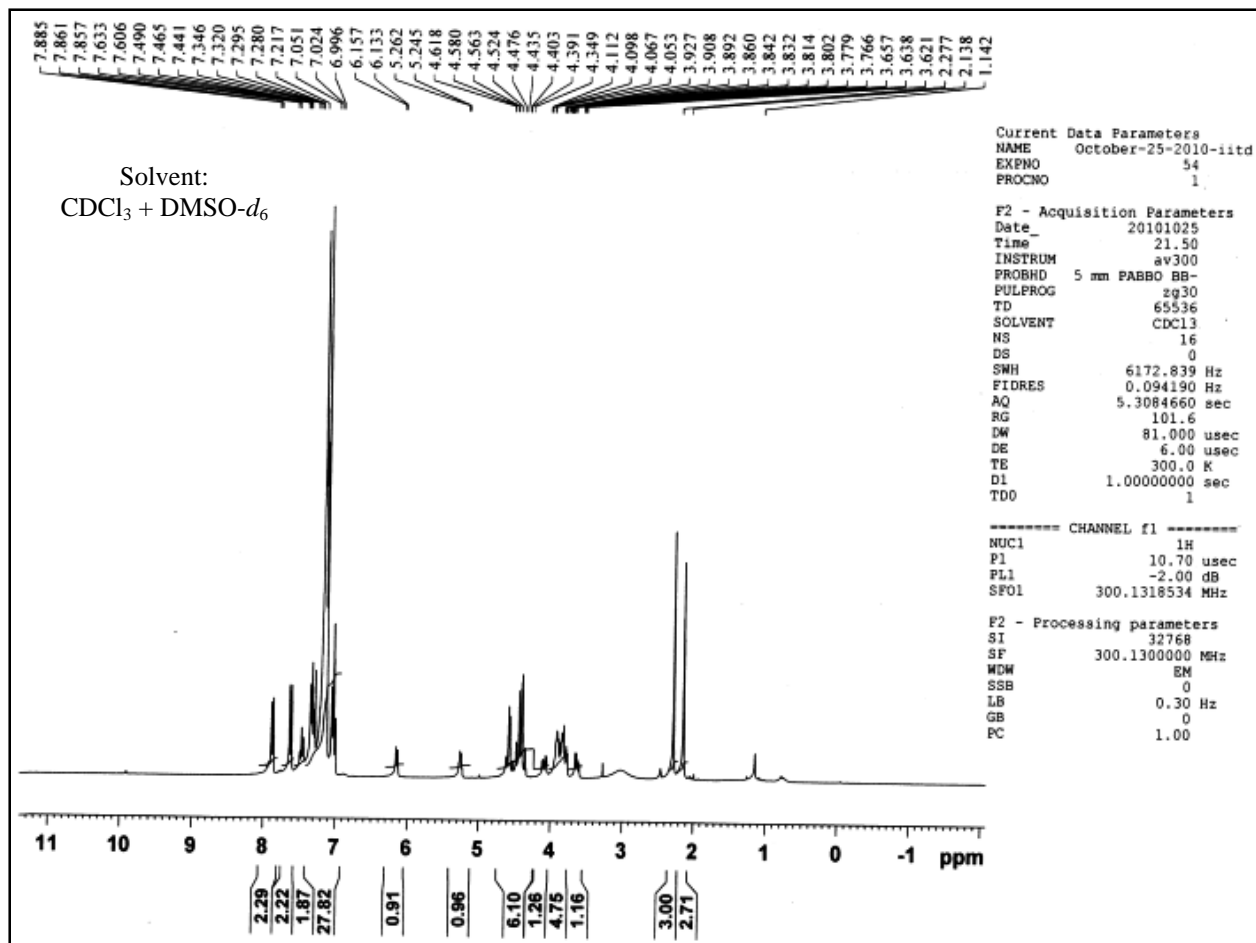

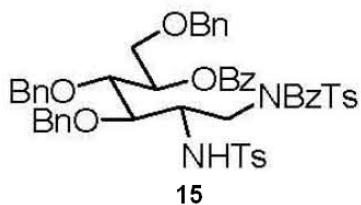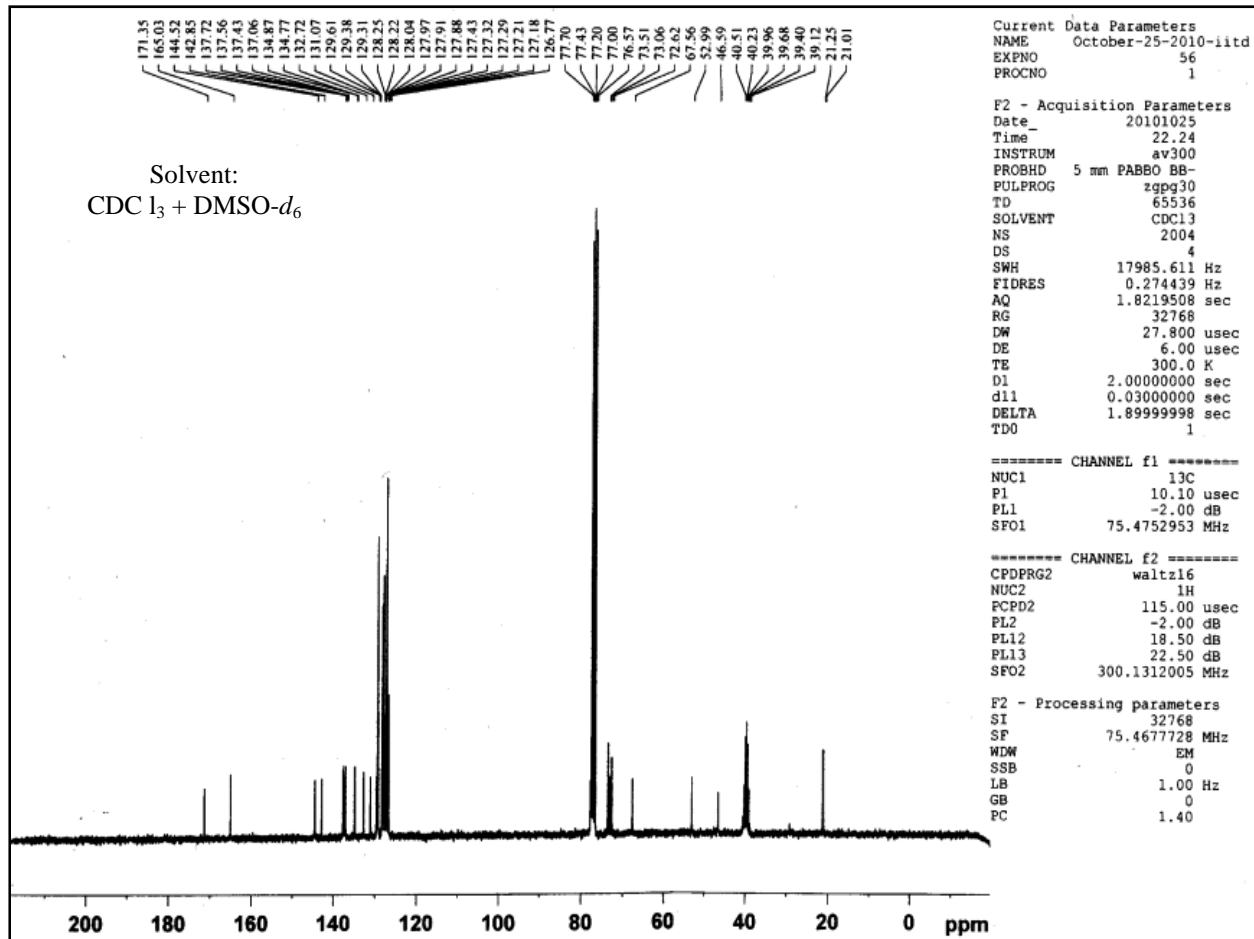



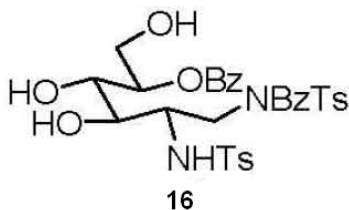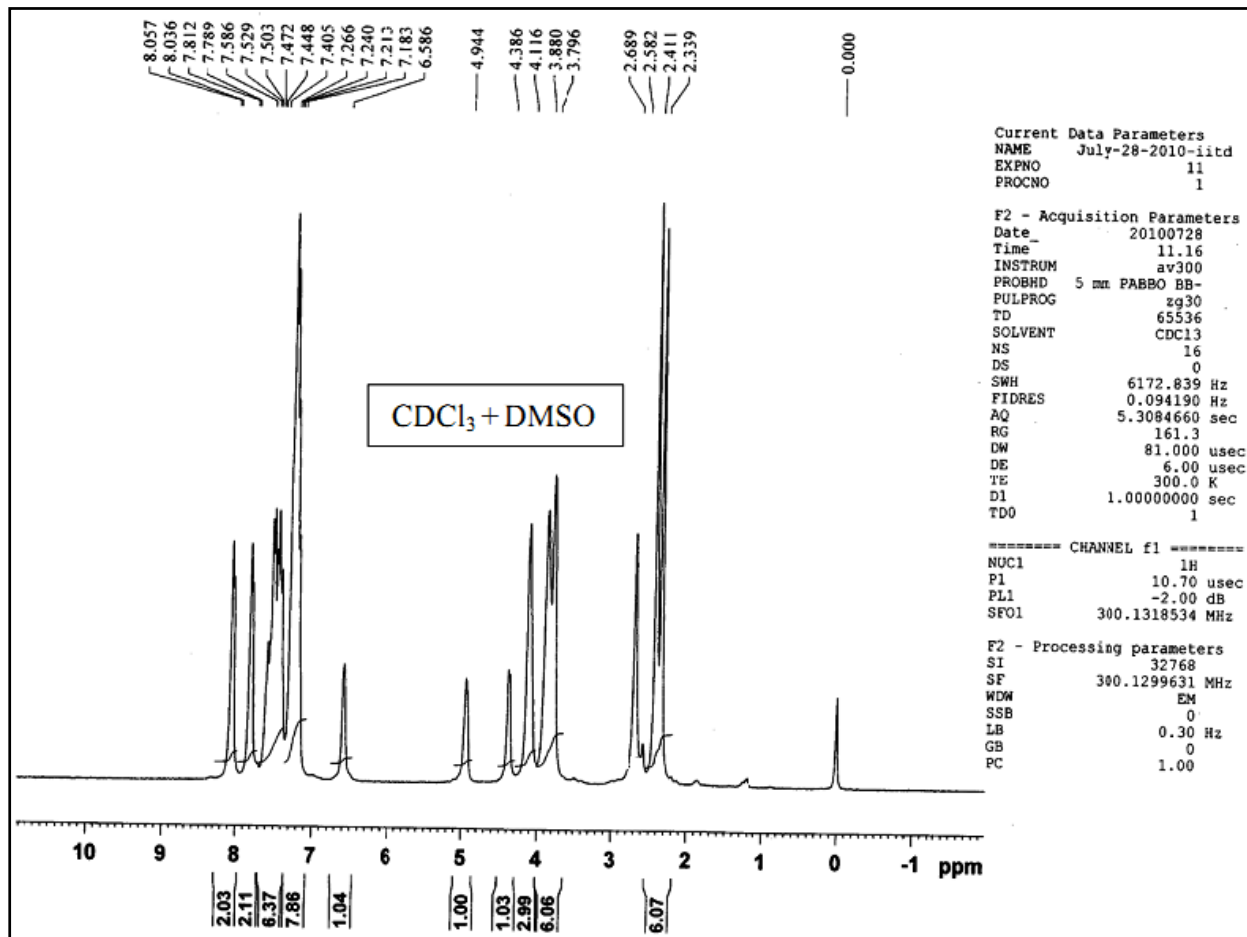

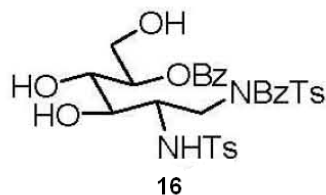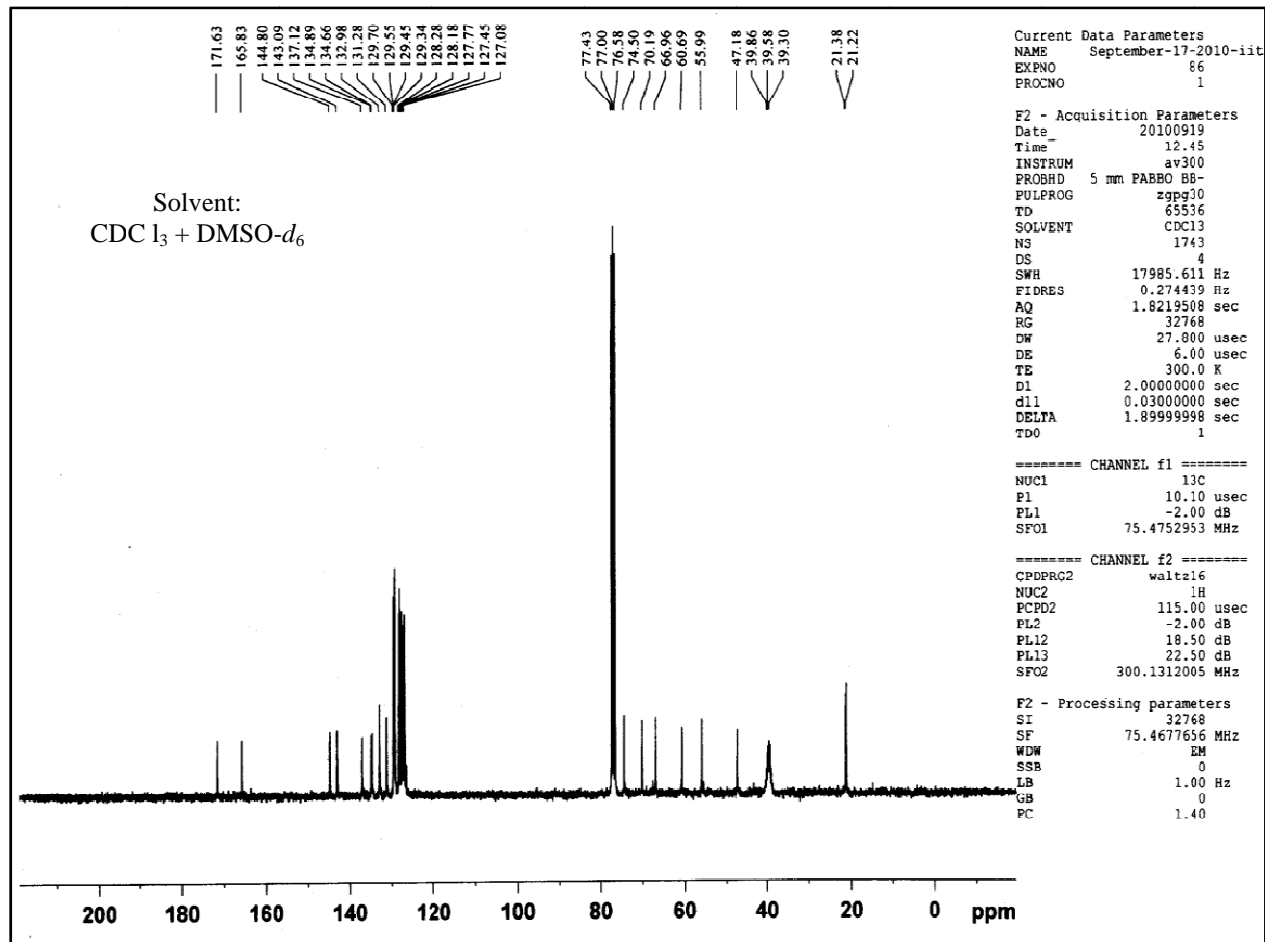

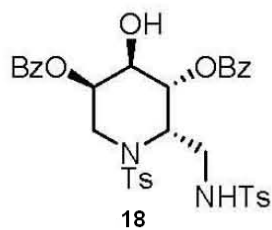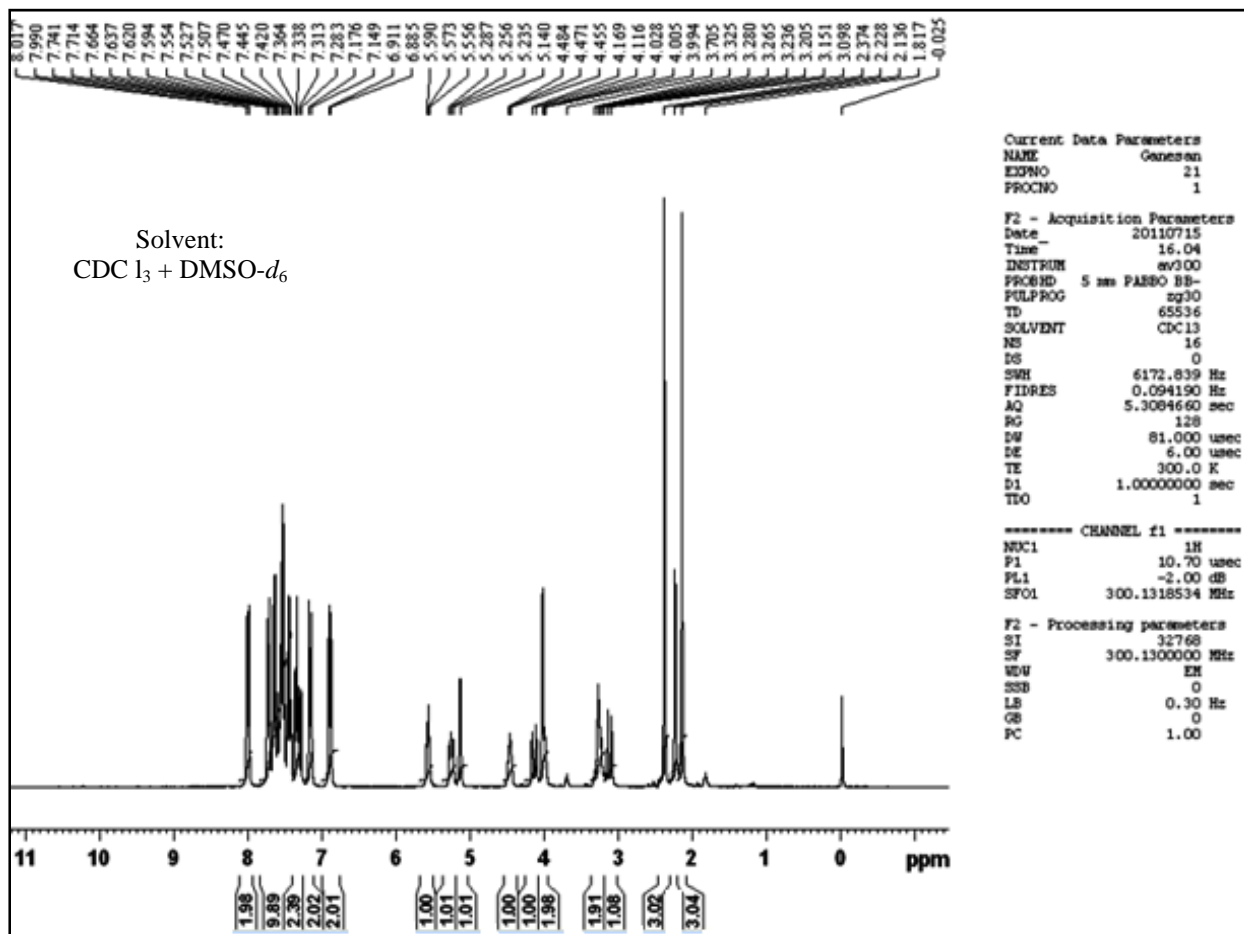

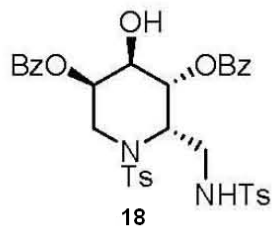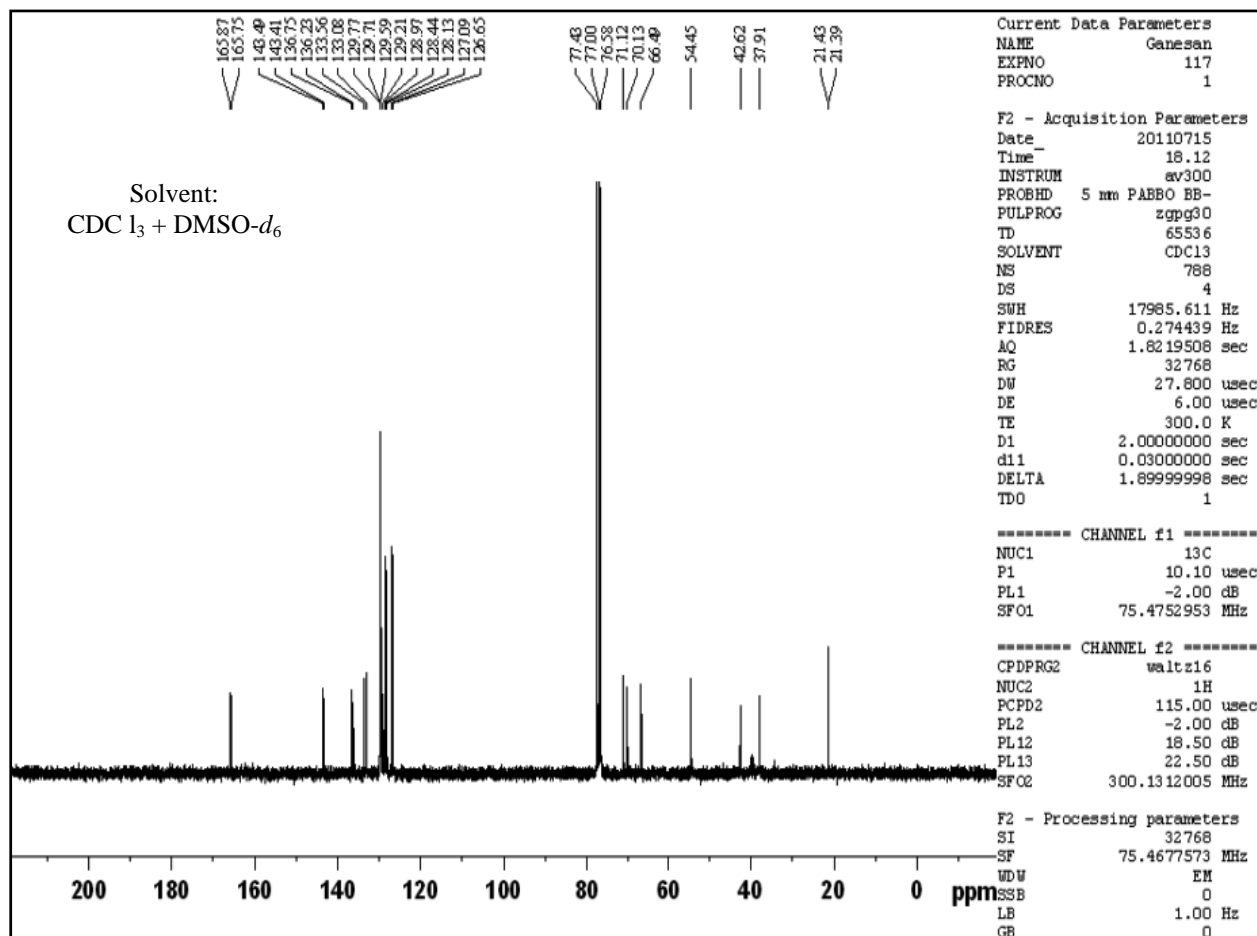

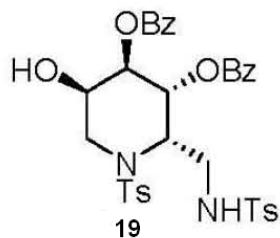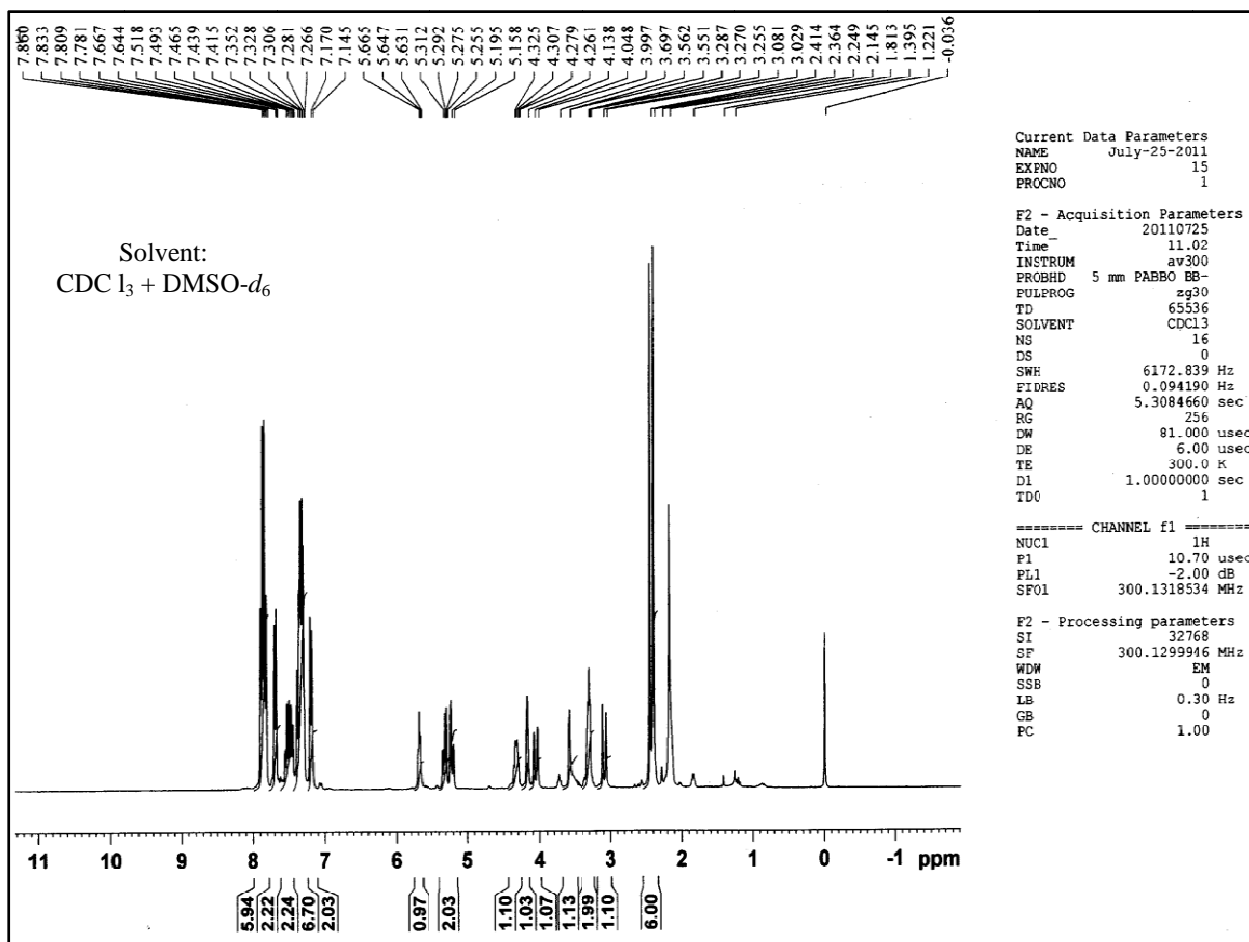

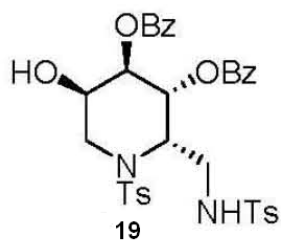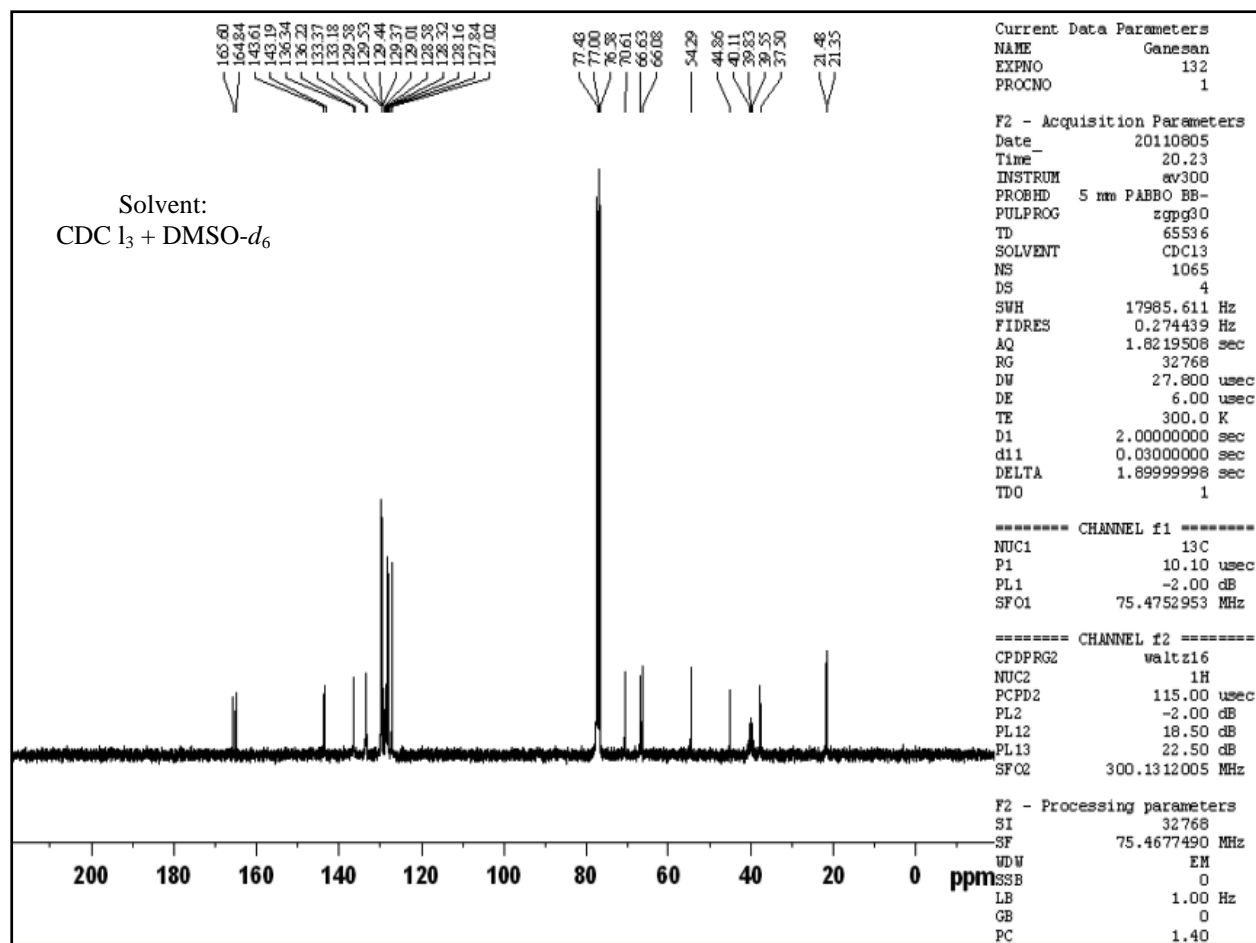

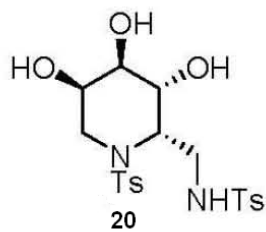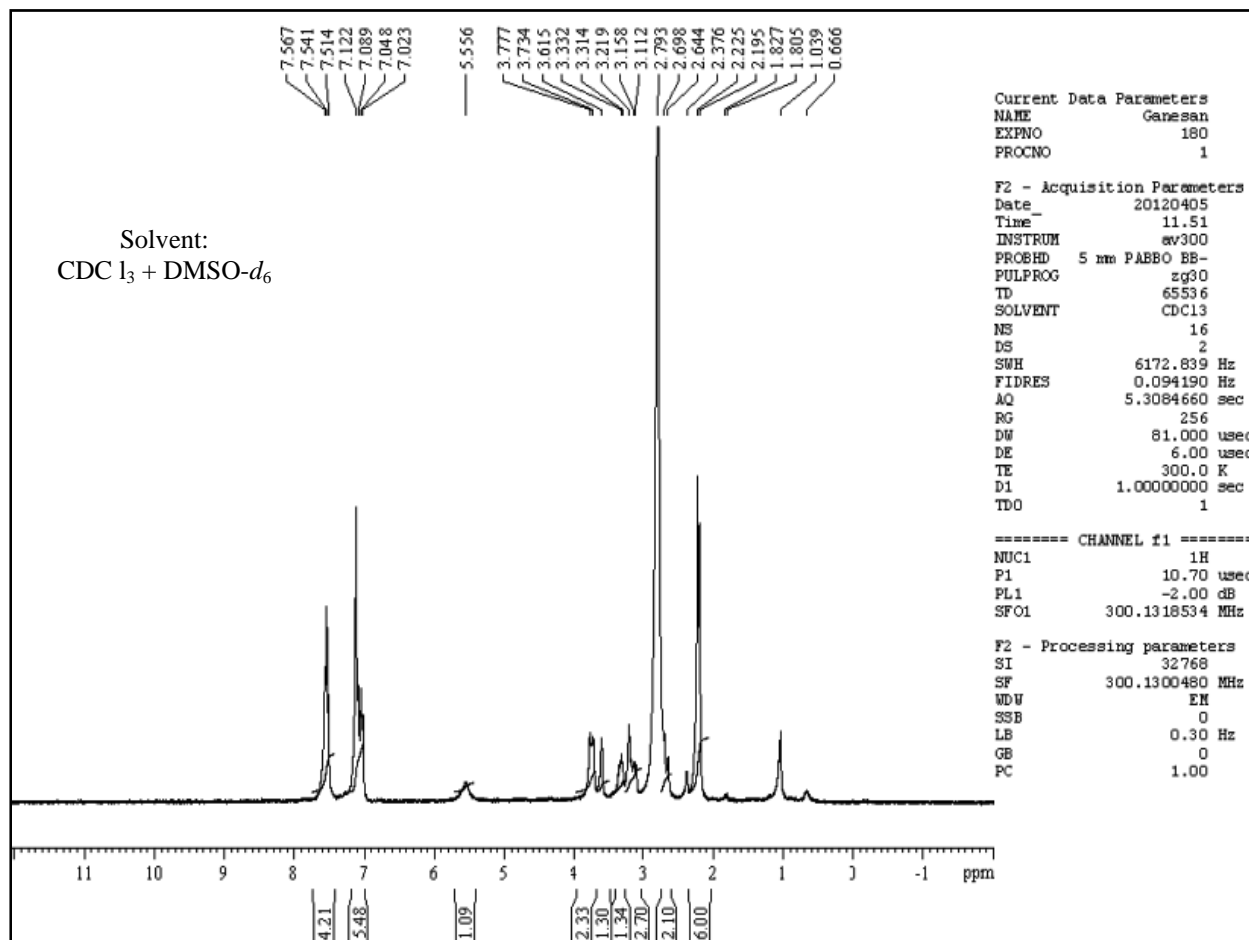

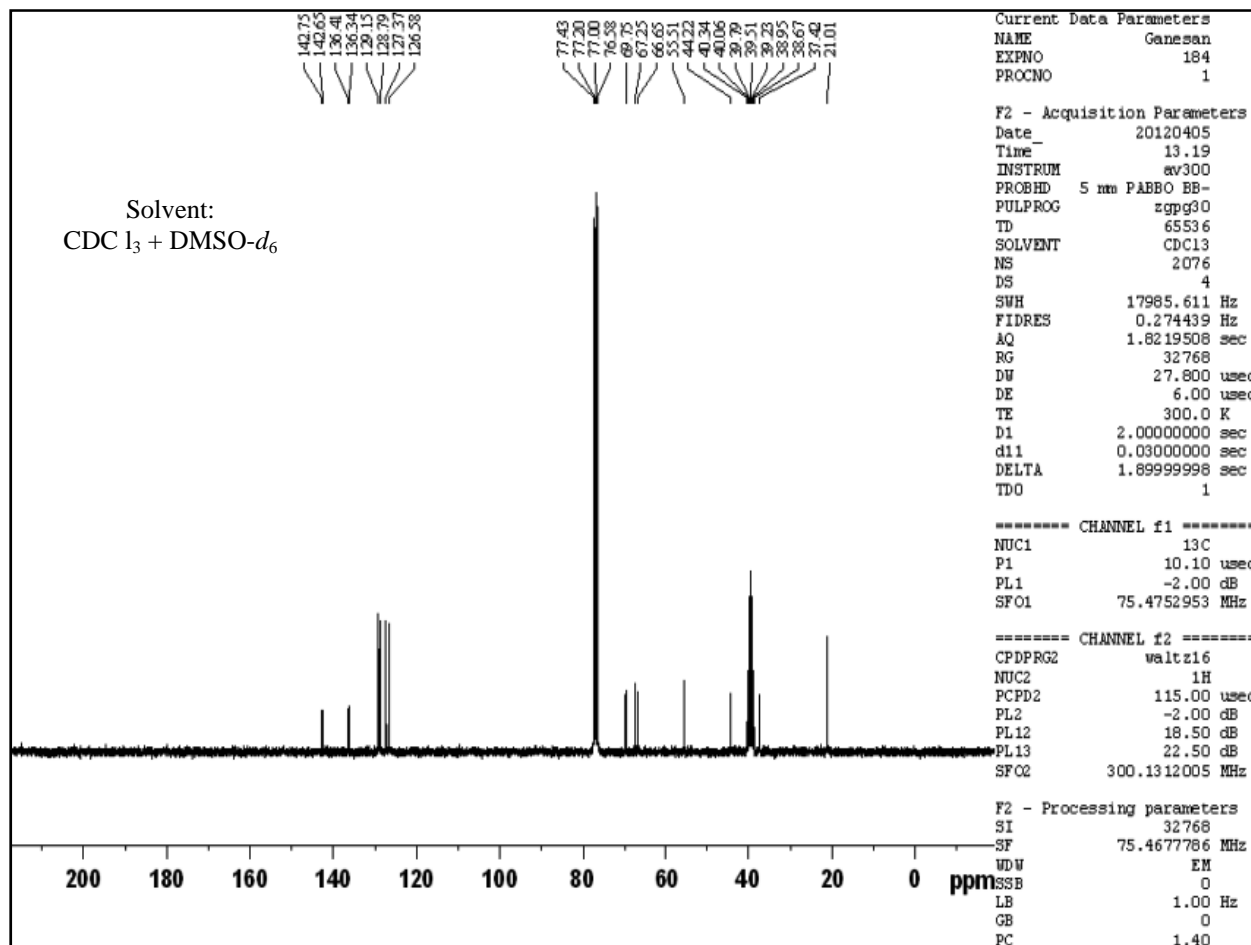



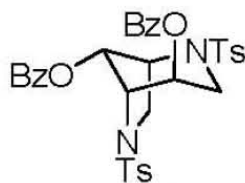

21

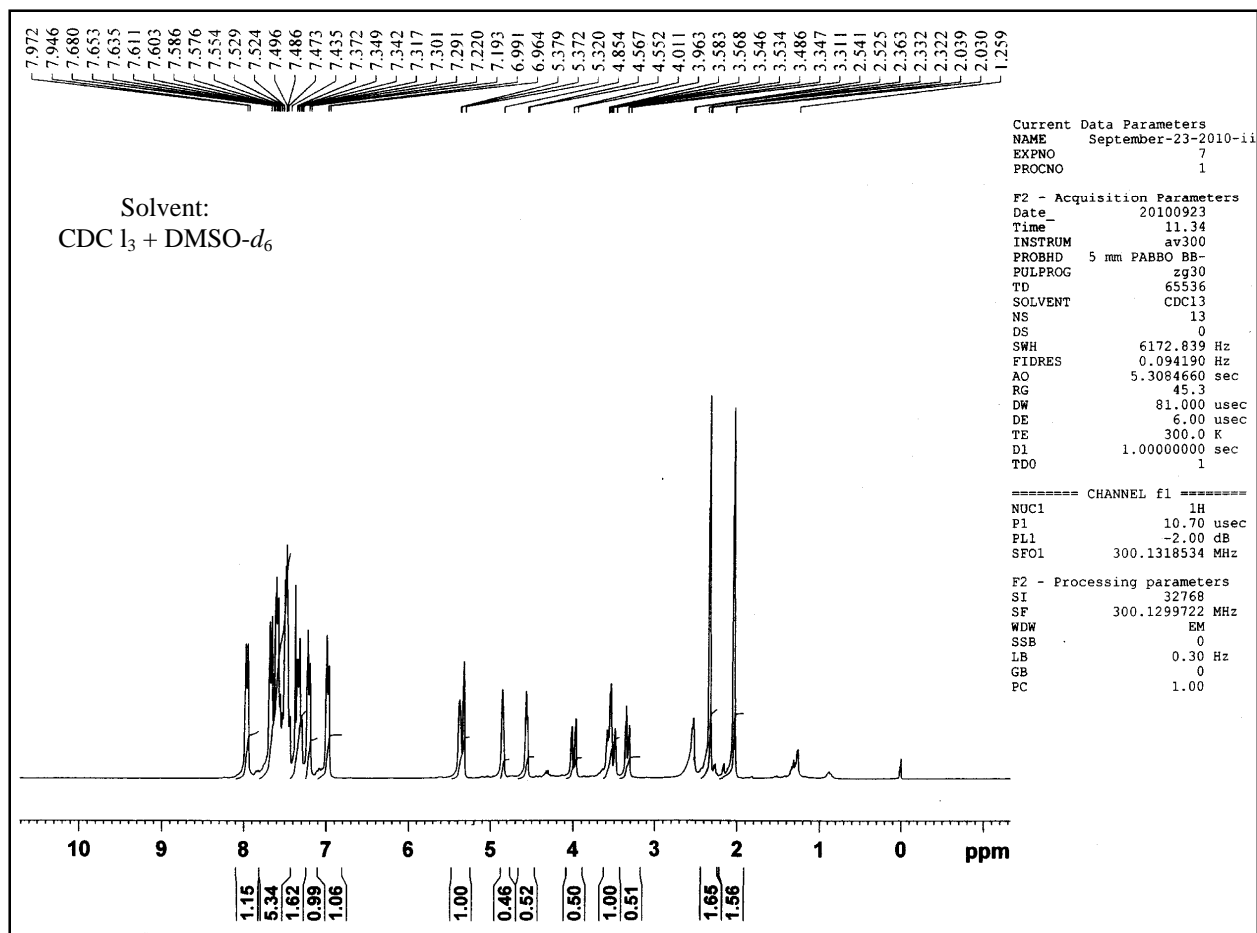

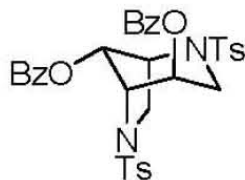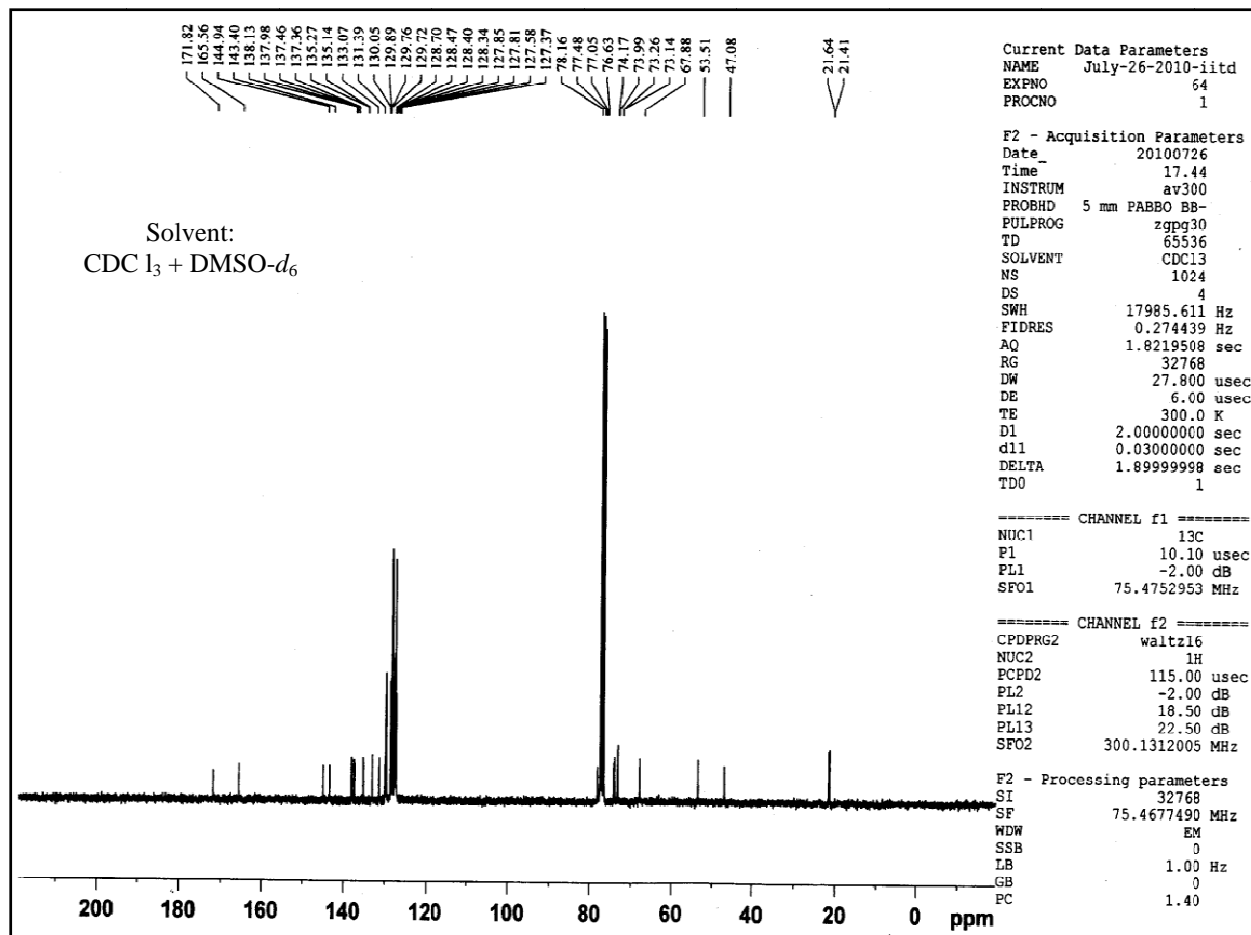

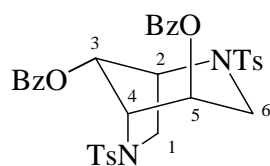

**21** Solvent:  $\text{CDCl}_3$

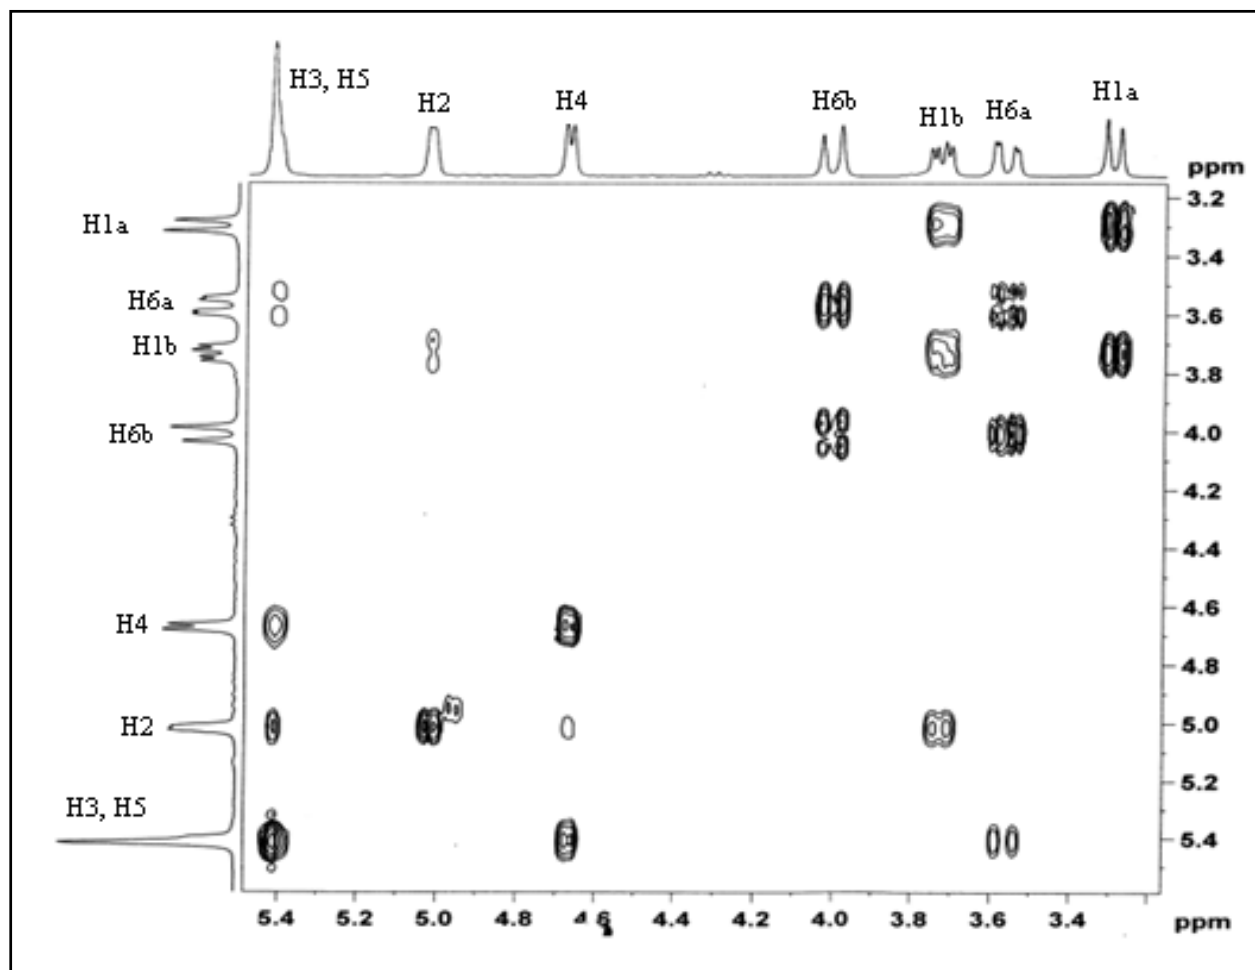

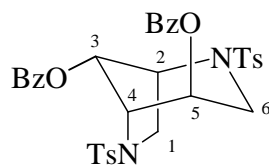

**21** Solvent:  $\text{CDCl}_3$

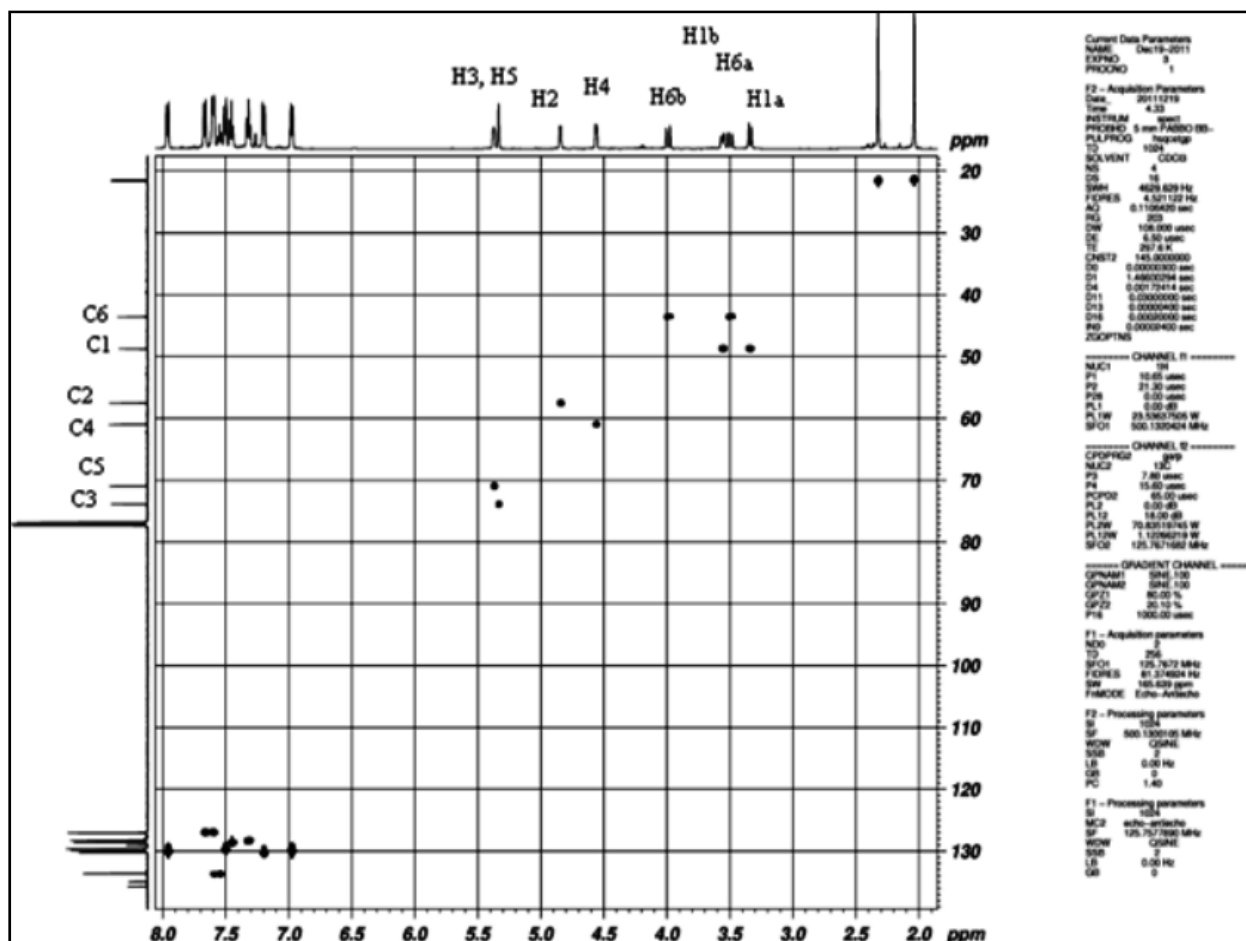

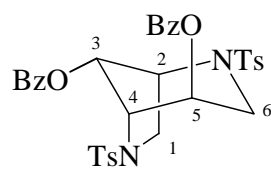

**21** Solvent:  $\text{CDCl}_3$

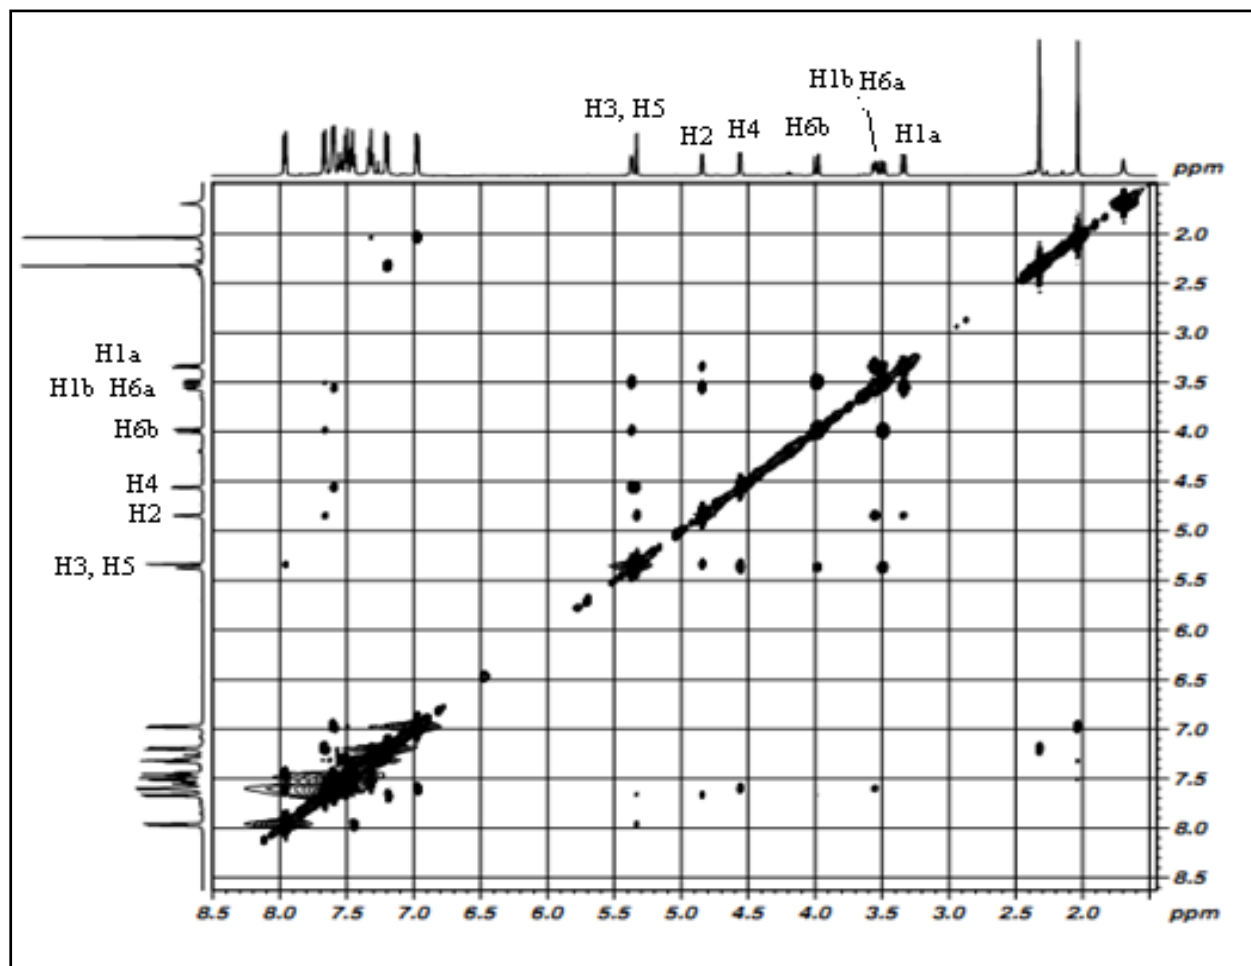

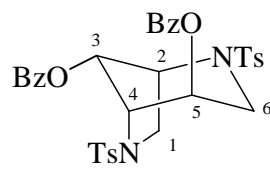

**21** Solvent:  $\text{CDCl}_3$

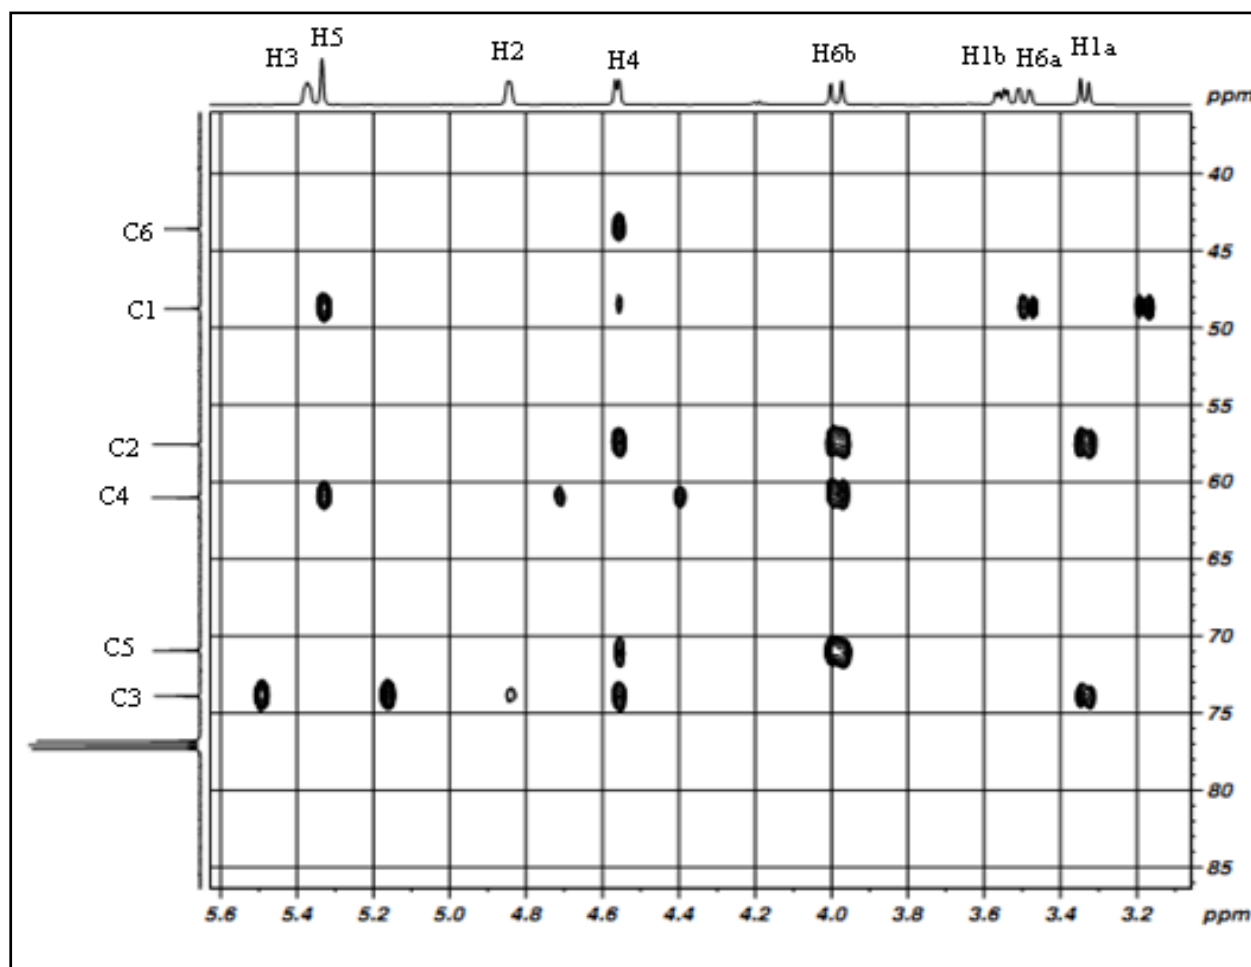

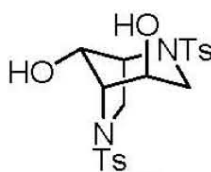

22

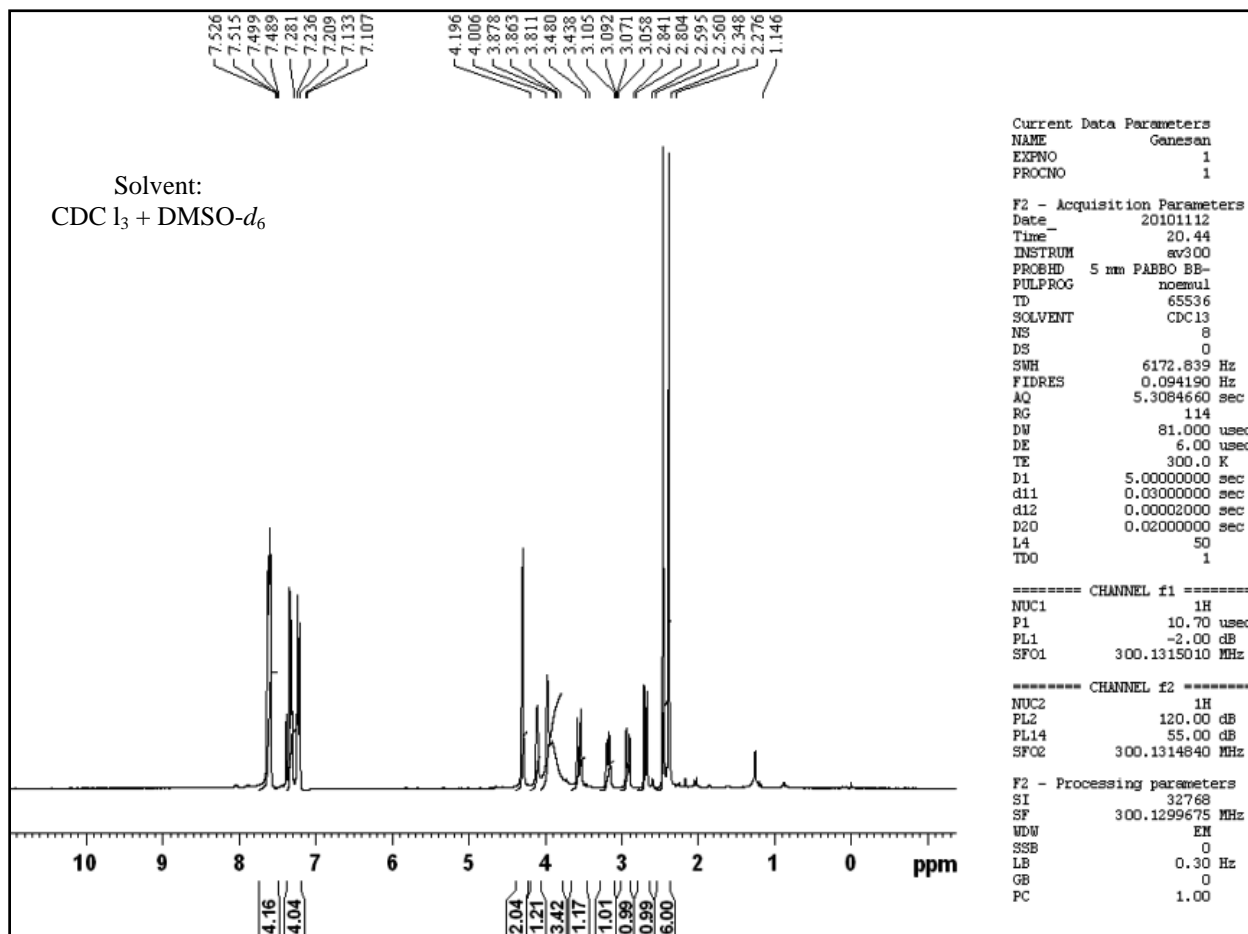

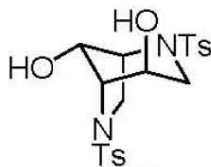

22

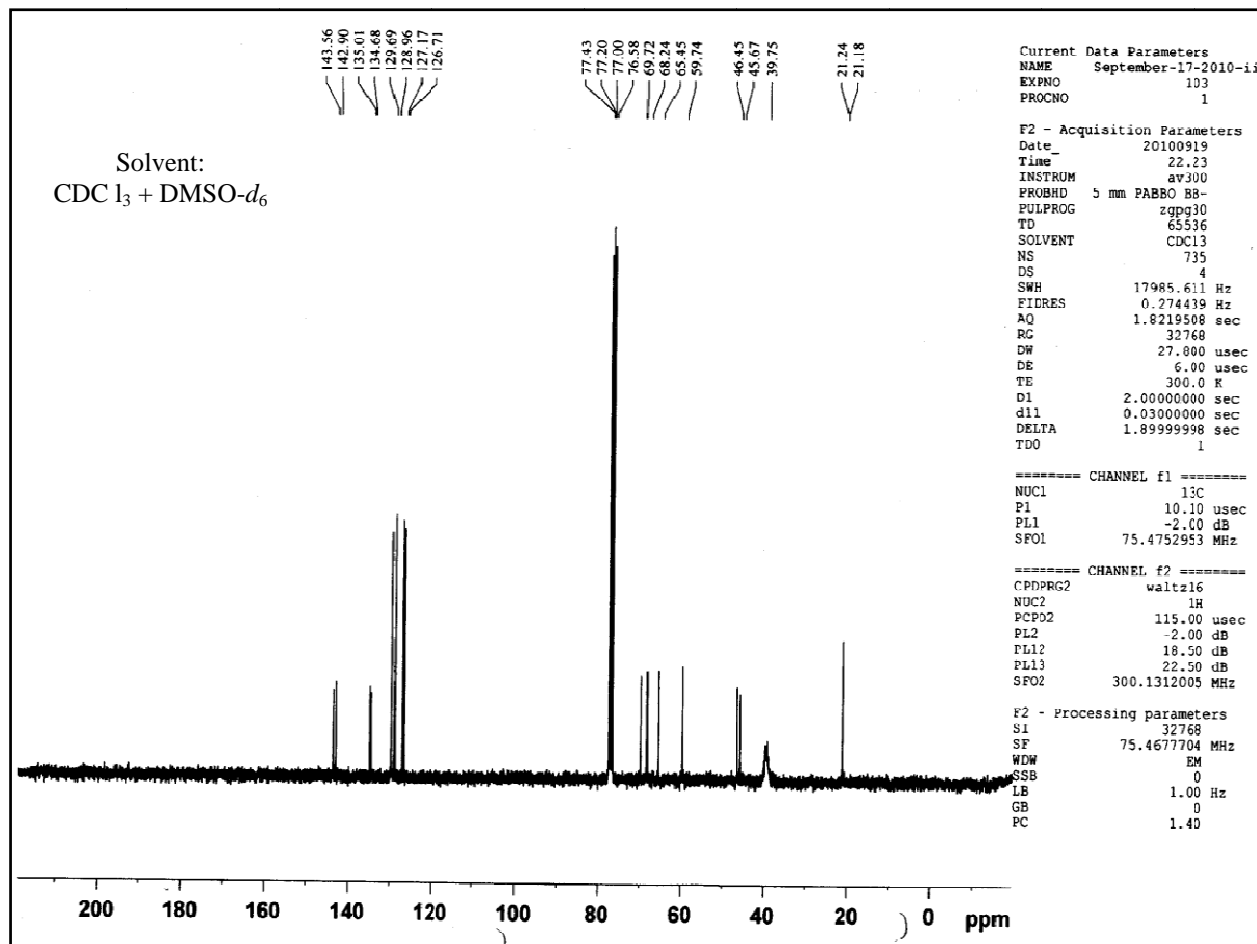



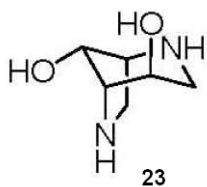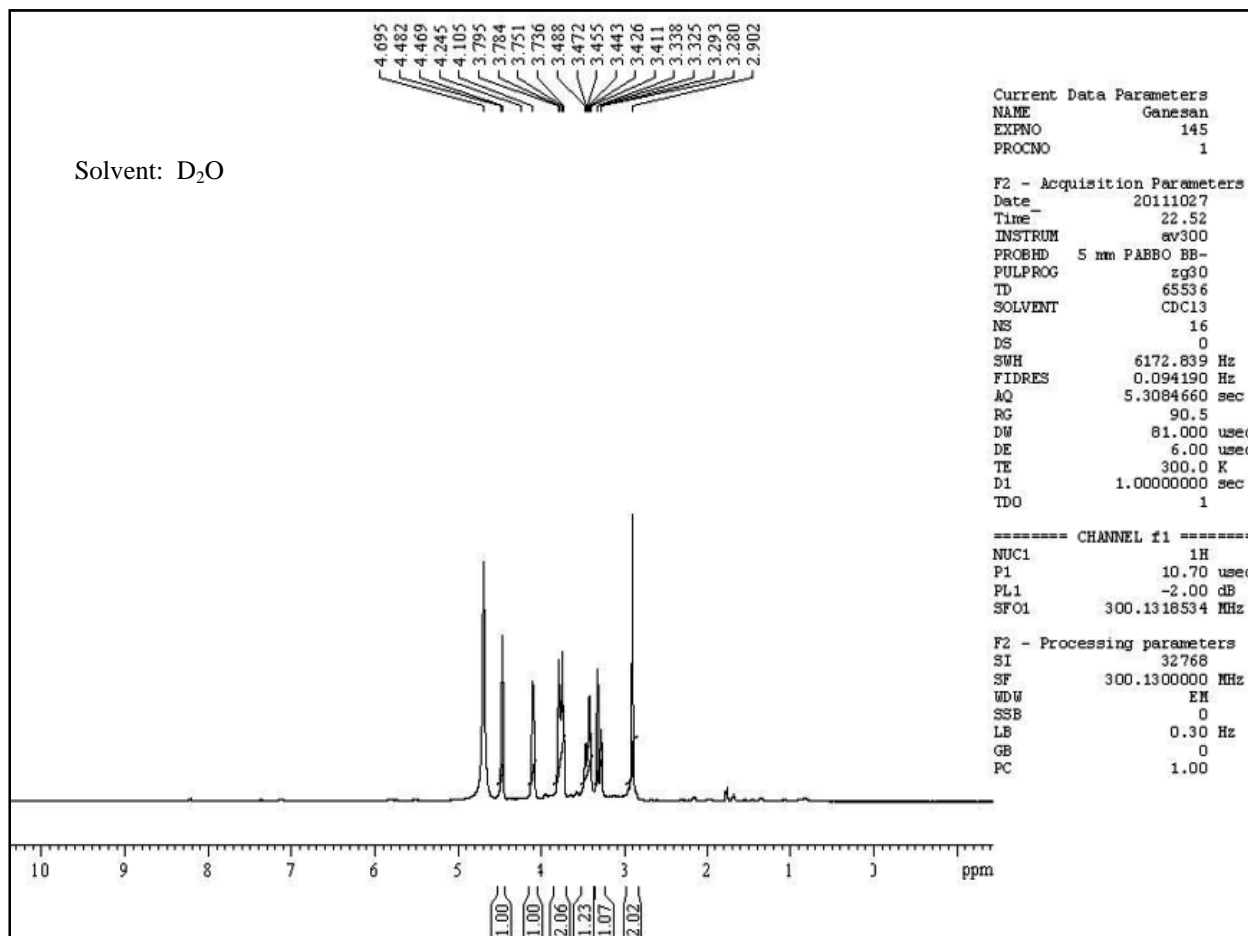

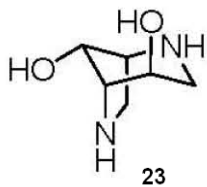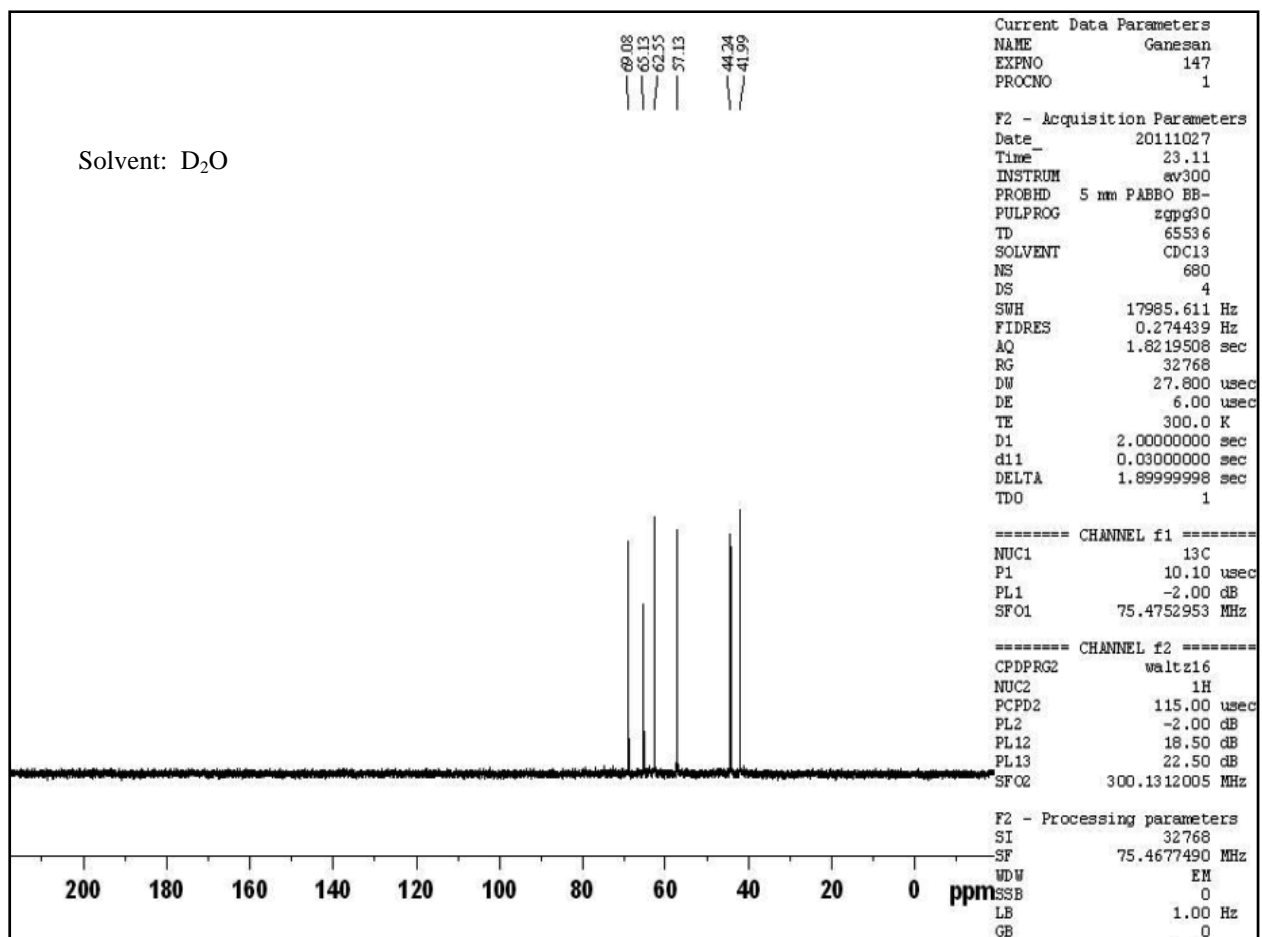

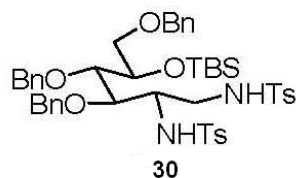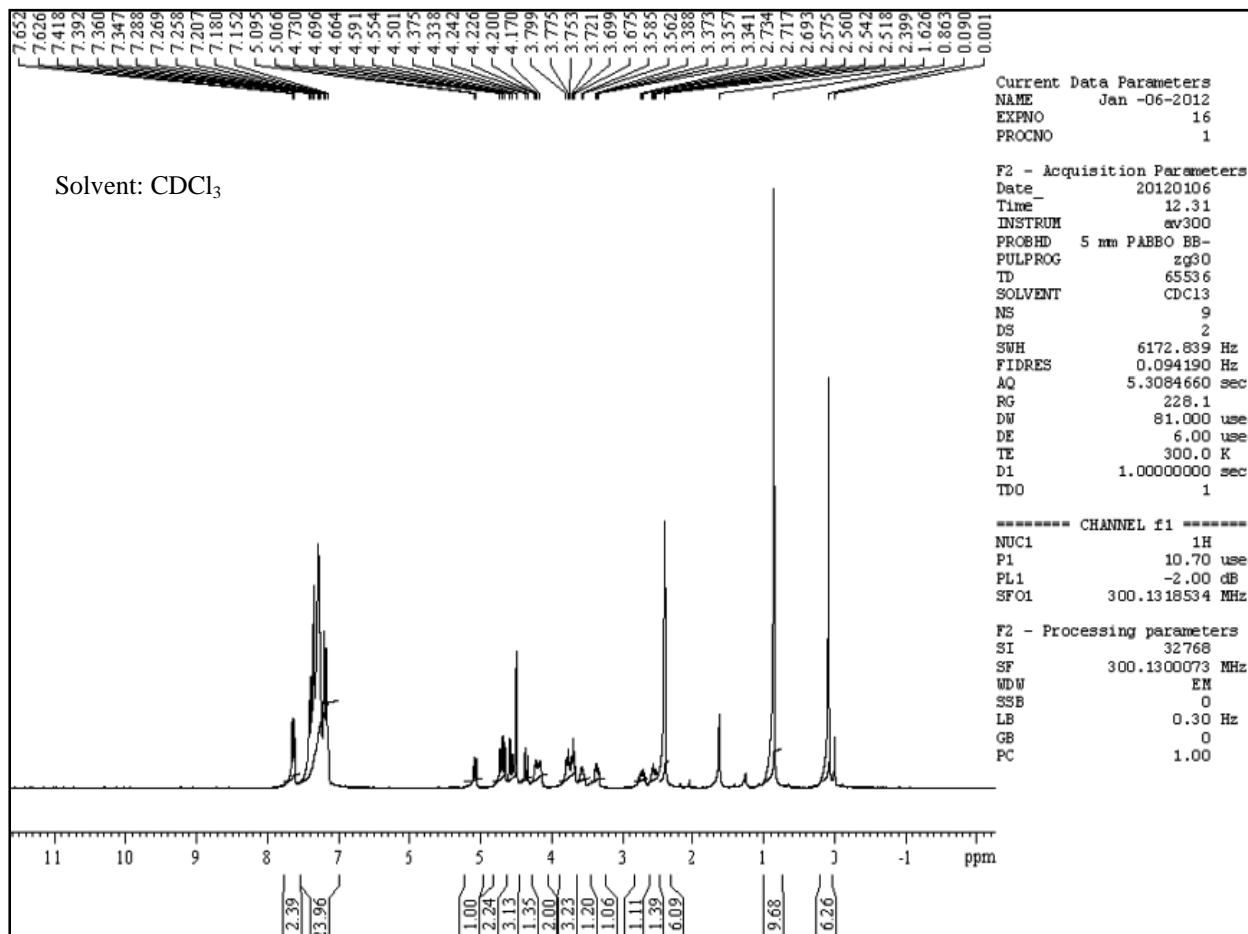

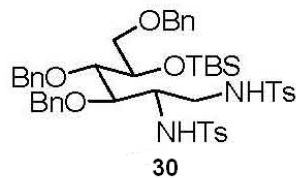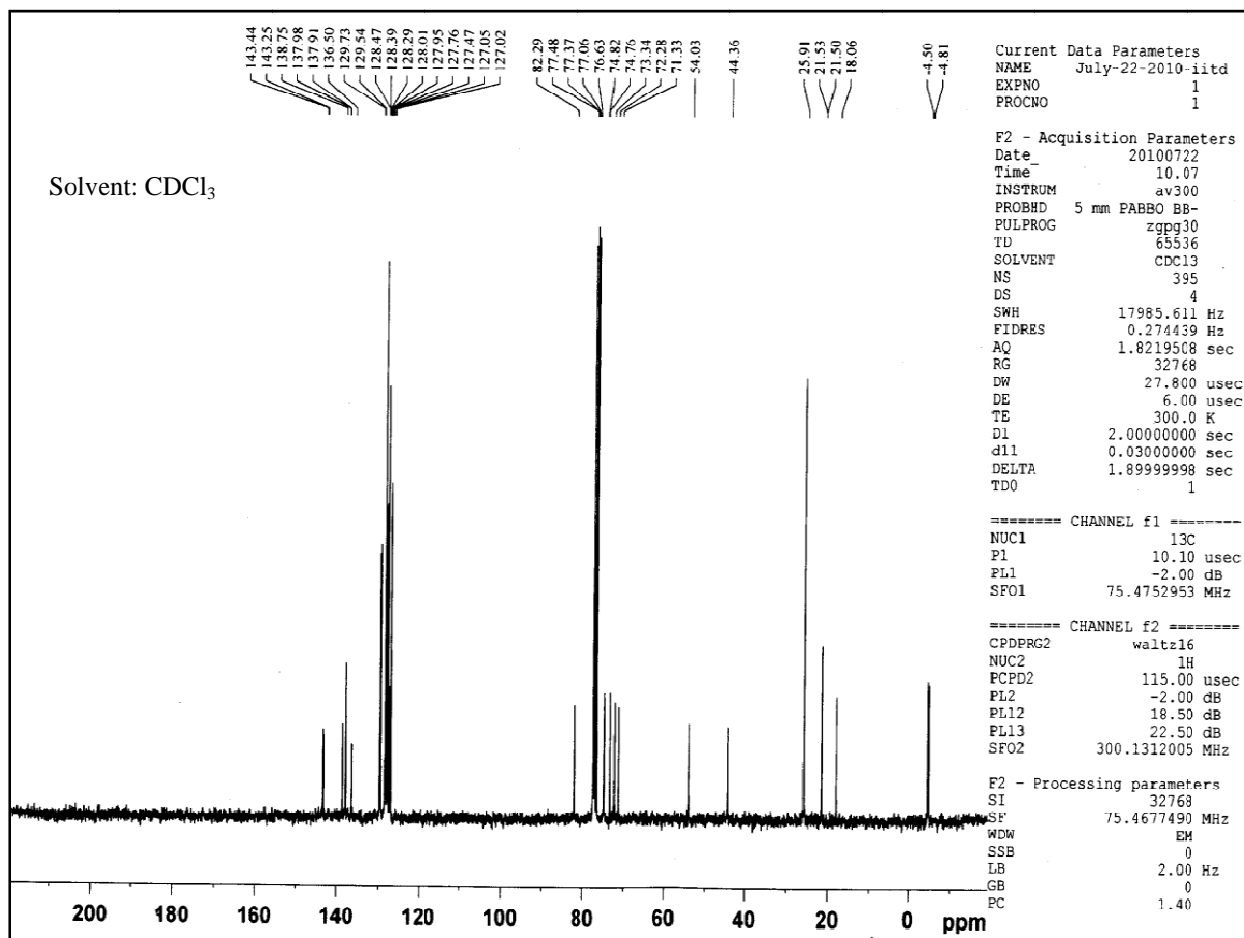

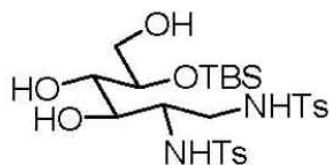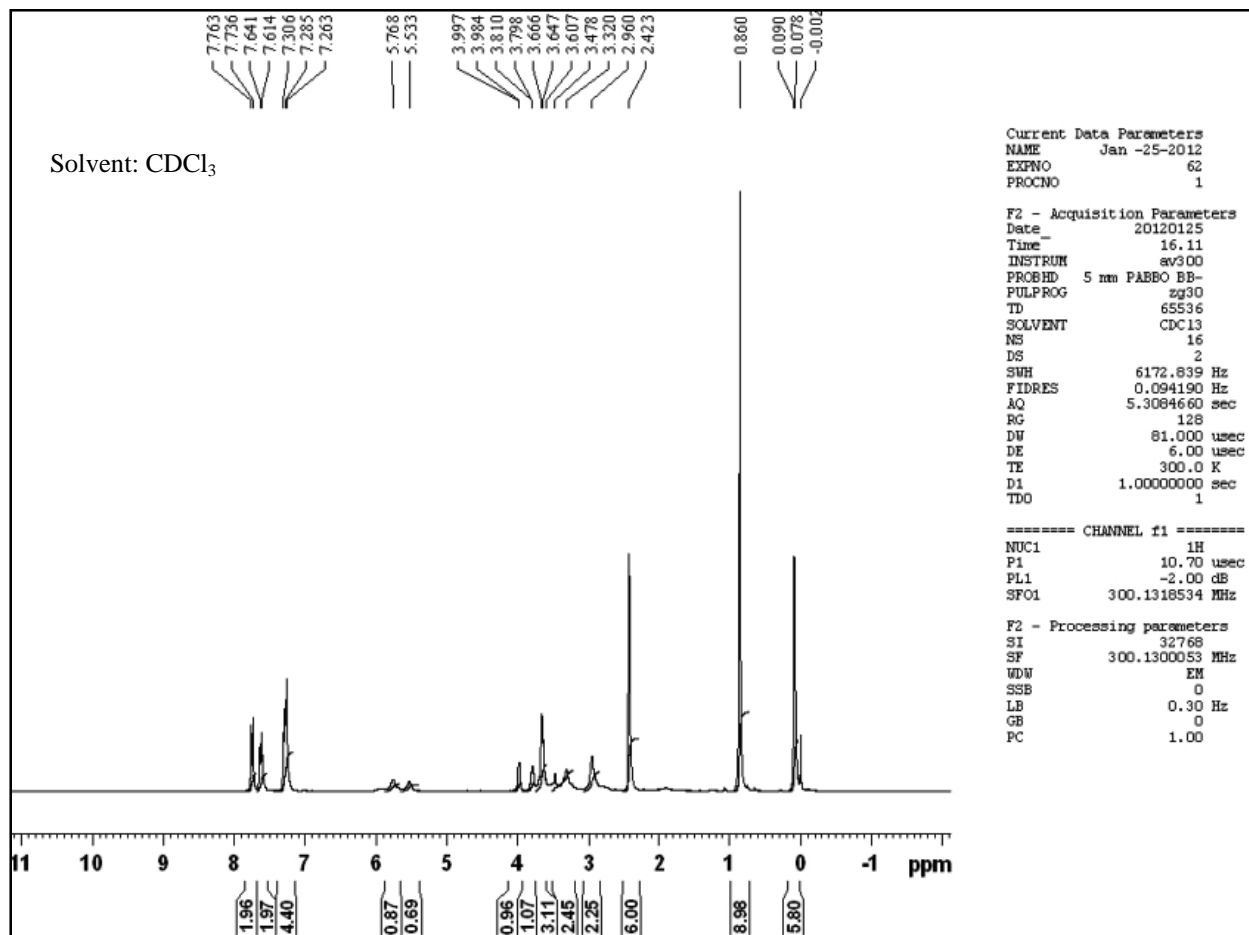

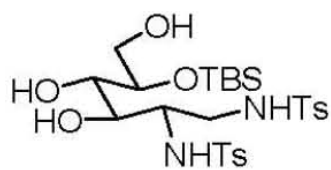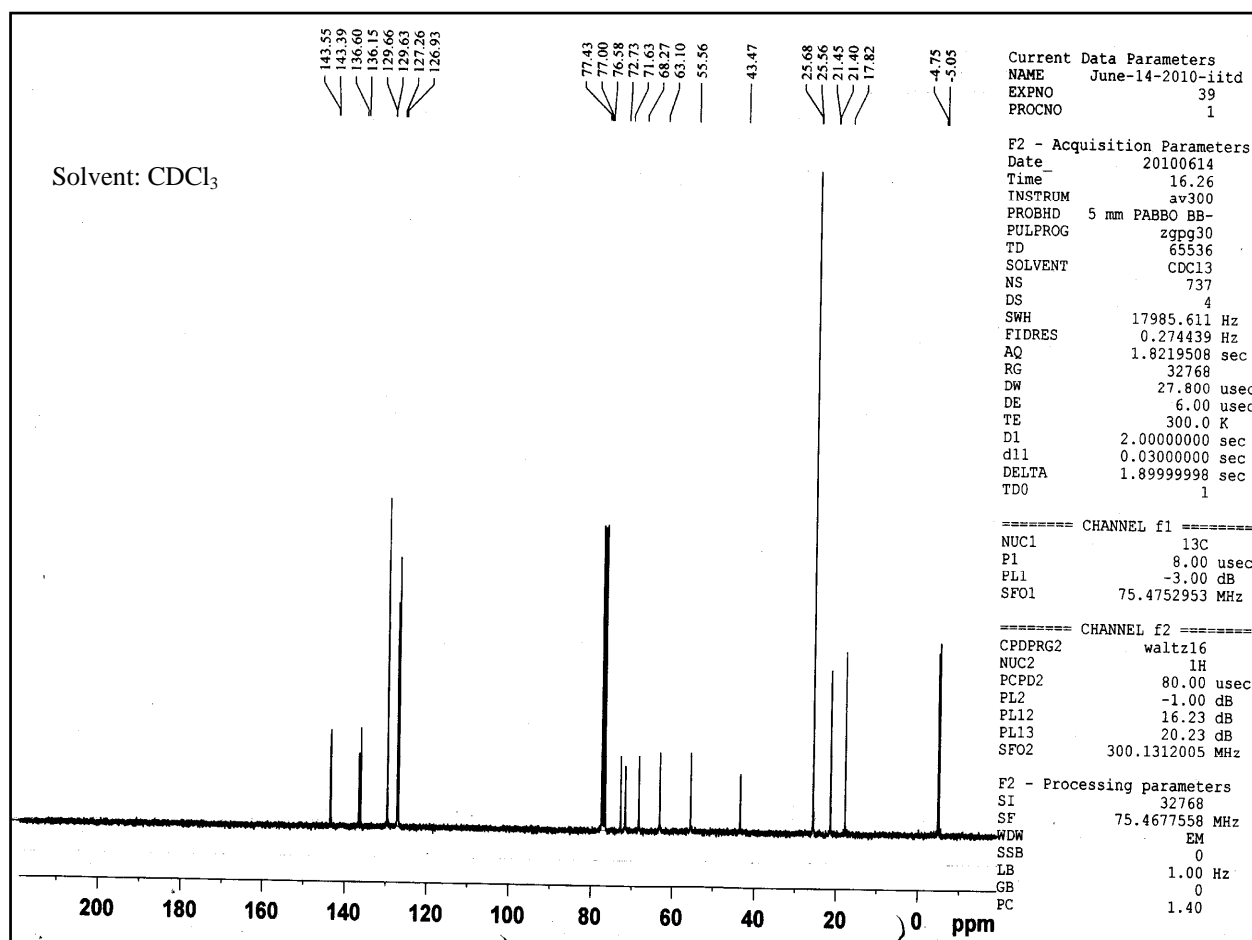

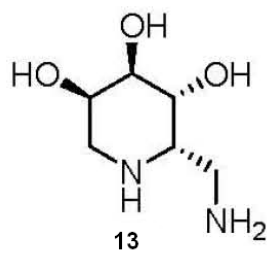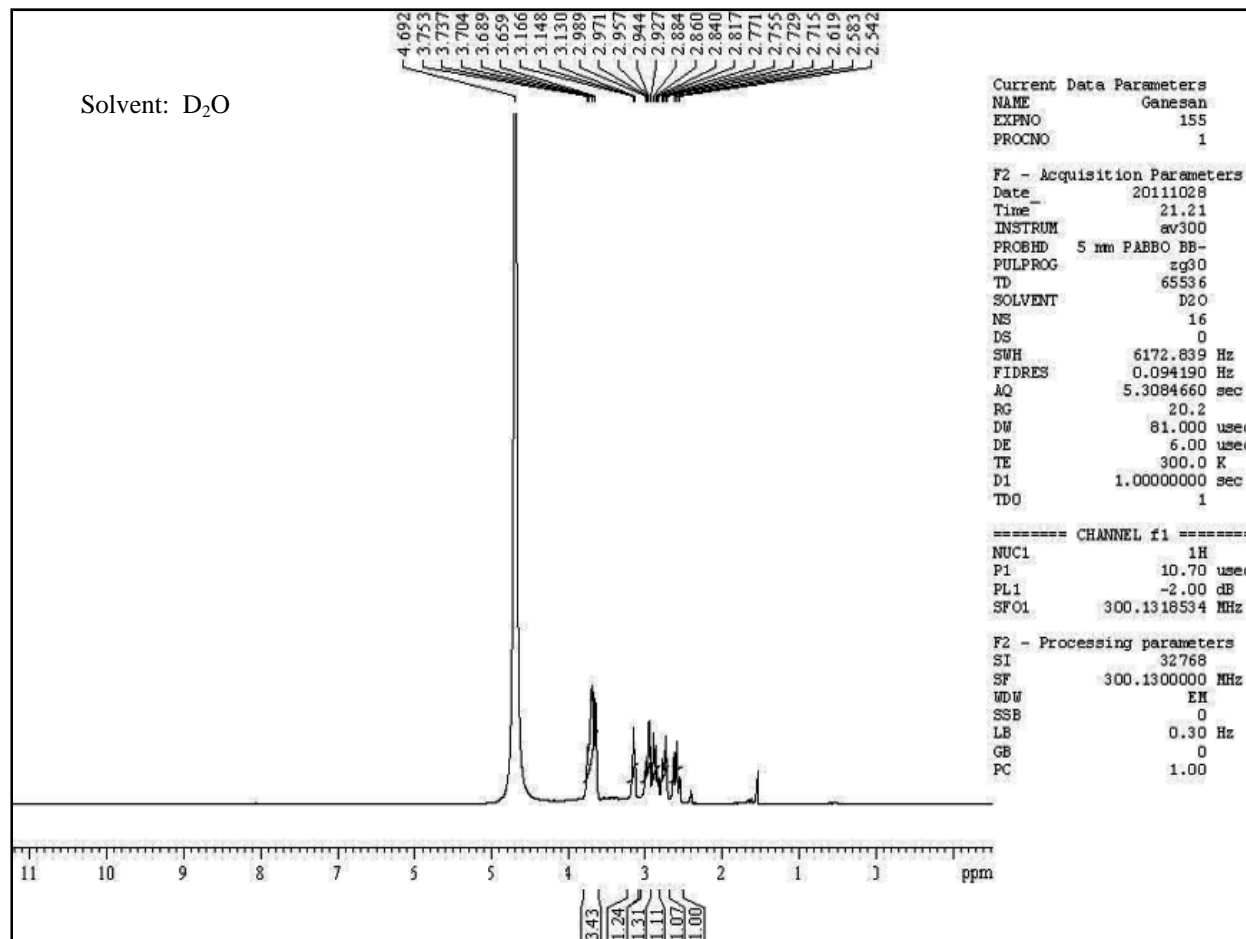

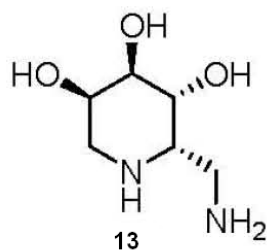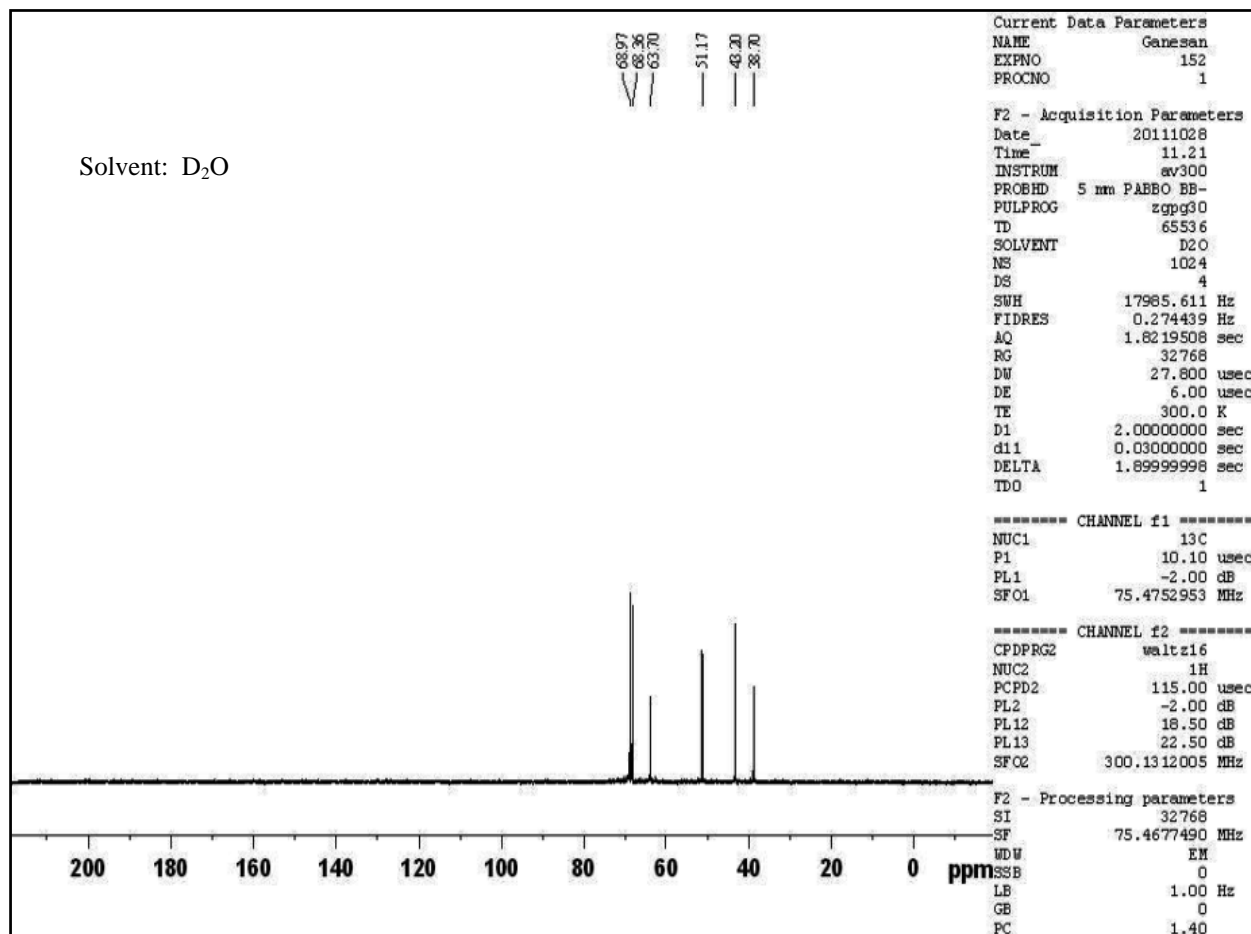



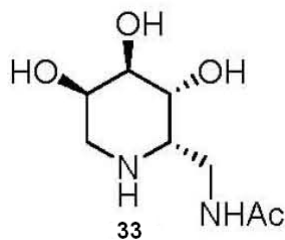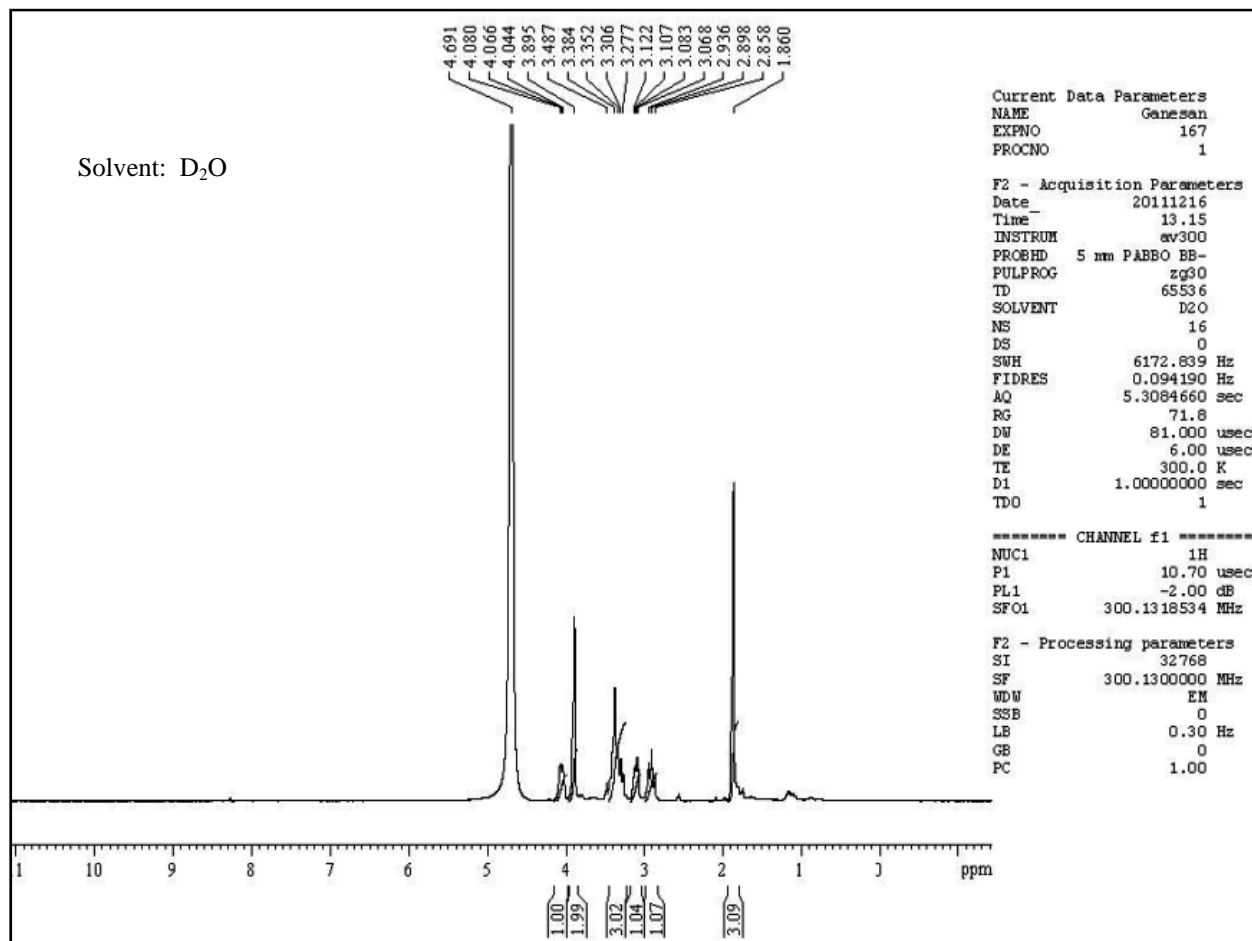

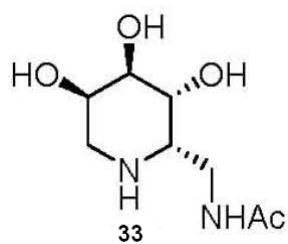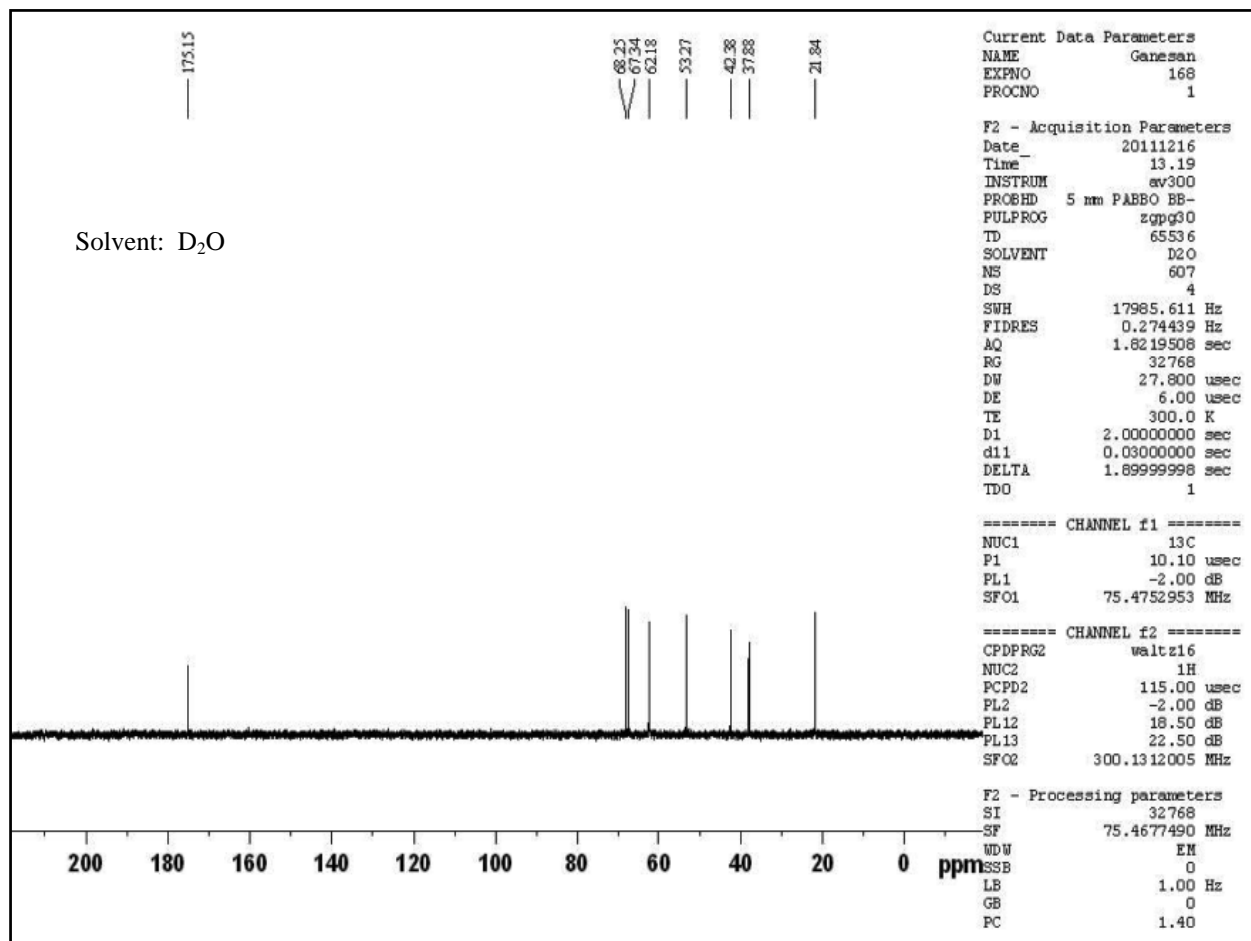

Energy values obtained from AM1 calculations for compound **18**.

### **<sup>4</sup>C<sub>1</sub> conformation**

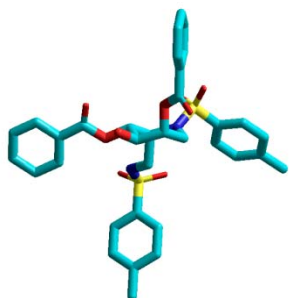

HyperChem

Single Point, SemiEmpirical, molecule = compound 18 4C1 conformation

AM1

Convergence limit = 0.0100000 Iteration limit = 50

Accelerate convergence = YES

RHF Calculation:

Singlet state calculation

Number of electrons = 246

Number of Double Occupied Levels = 123

Charge on the System = 0

Total Orbitals = 222

Starting AM1 calculation with 222 orbitals

Iteration = 1 Difference = 43026.92948

Iteration = 2 Difference = 835.24005

Iteration = 3 Difference = 311.20153

Iteration = 4 Difference = 60.77617

Iteration = 5 Difference = 5.77144

Iteration = 6 Difference = 0.94989

Iteration = 7 Difference = 0.36973

Iteration = 8 Difference = 0.15674

Iteration = 9 Difference = 0.01750

Iteration = 10 Difference = 0.00211

Energy=-8715.174040 kcal/mol Gradient=0.010078 Symmetry=C1

### ENERGIES AND GRADIENT

Total Energy = -196163.9297082 (kcal/mol)

Total Energy = -312.607081781 (a.u.)

Binding Energy = -8715.1740402 (kcal/mol)

Isolated Atomic Energy = -187448.7556680 (kcal/mol)

Electronic Energy = -2048766.1025866 (kcal/mol)

Core-Core Interaction = 1852602.1728784 (kcal/mol)

Heat of Formation = -238.6150402 (kcal/mol)

Gradient = 0.0100781 (kcal/mol/Ang)

Energy values obtained from AM1 calculations for compound **18**.

### <sup>1</sup>C<sub>4</sub> conformation

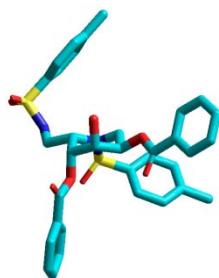

HyperChem

Single Point, SemiEmpirical, molecule = Compound 18 1C4conformation

AM1

Convergence limit = 0.0100000 Iteration limit = 50

Accelerate convergence = YES

RHF Calculation:

Singlet state calculation

Number of electrons = 246

Number of Double Occupied Levels = 123

Charge on the System = 0

Total Orbitals = 222

Starting AM1 calculation with 222 orbitals

Iteration = 1 Difference = 42965.74988

Iteration = 2 Difference = 739.56074

Iteration = 3 Difference = 483.93724

Iteration = 4 Difference = 37.20935

Iteration = 5 Difference = 31.04263

Iteration = 6 Difference = 12.07024

Iteration = 7 Difference = 0.49754

Iteration = 8 Difference = 0.10846

Iteration = 9 Difference = 0.03581

Iteration = 10 Difference = 0.00509

Energy=-8710.354647 kcal/mol Gradient=0.011840 Symmetry=C1

### ENERGIES AND GRADIENT

Total Energy = -196159.1103152 (kcal/mol)

Total Energy = -312.599401590 (a.u.)

Binding Energy = -8710.3546472 (kcal/mol)

Isolated Atomic Energy = -187448.7556680 (kcal/mol)

Electronic Energy = -2075762.5924566 (kcal/mol)

Core-Core Interaction = 1879603.4821414 (kcal/mol)

Heat of Formation = -233.7956472 (kcal/mol)

Gradient = 0.0118404 (kcal/mol/Ang)

Energy values obtained from AM1 calculations for compound **32**.

### **$^4C_1$ conformation**

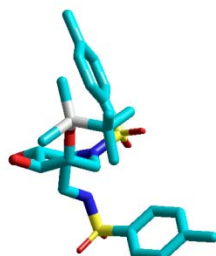

Single Point, SemiEmpirical, molecule = Compound 32 4C1 conformation

Convergence limit = 0.0100000 Iteration limit = 50

Accelerate convergence = YES

RHF Calculation:

Singlet state calculation

Number of electrons = 212

Number of Double Occupied Levels = 106

Charge on the System = 0

Total Orbitals = 192

Starting AM1 calculation with 192 orbitals

Iteration = 1 Difference = 36057.82216

Iteration = 2 Difference = 16180.24218

Iteration = 3 Difference = 233468.93302

Iteration = 4 Difference = 29013.66024

Iteration = 5 Difference = 22409.35142

Iteration = 6 Difference = 20729.57217

Iteration = 7 Difference = 18638.80718

Iteration = 8 Difference = 17267.76299

Iteration = 9 Difference = 17629.67606

Iteration = 10 Difference = 13519.35793

Iteration = 11 Difference = 13210.18953

Iteration = 12 Difference = 14745.32072

Iteration = 13 Difference = 10454.82766

Iteration = 14 Difference = 10506.87059

Iteration = 15 Difference = 10499.39503

Iteration = 16 Difference = 7818.42915

Iteration = 17 Difference = 7640.62574

Iteration = 18 Difference = 9127.54071

Iteration = 19 Difference = 1875.64288

Iteration = 20 Difference = 3848.72792

Iteration = 21 Difference = 3831.27258

Iteration = 22 Difference = 764.00322

Iteration = 23 Difference = 9557.30537

Iteration = 24 Difference = 7872.61831  
Iteration = 25 Difference = 3515.24517  
Iteration = 26 Difference = 716.52752  
Iteration = 27 Difference = 2488.58444  
Iteration = 28 Difference = 763.24803  
Iteration = 29 Difference = 523.72090  
Iteration = 30 Difference = 697.58419  
Iteration = 31 Difference = 300.77296  
Iteration = 32 Difference = 315.70935  
Iteration = 33 Difference = 280.81333  
Iteration = 34 Difference = 25.36051  
Iteration = 35 Difference = 63.24076  
Iteration = 36 Difference = 59.32193  
Iteration = 37 Difference = 63.56930  
Iteration = 38 Difference = 51.28497  
Iteration = 39 Difference = 46.34042  
Iteration = 40 Difference = 46.32716  
Iteration = 41 Difference = 24.47290  
Iteration = 42 Difference = 0.25808  
Iteration = 43 Difference = 0.03340  
Iteration = 44 Difference = 0.01278  
Iteration = 45 Difference = 0.00102  
Energy=-7706.619235 kcal/mol Gradient=0.010289 Symmetry=C1

#### ENERGIES AND GRADIENT

Total Energy = -161685.7925528 (kcal/mol)  
Total Energy = -257.662679630 (a.u.)  
Binding Energy = -7706.6192348 (kcal/mol)  
Isolated Atomic Energy = -153979.1733180 (kcal/mol)  
Electronic Energy = -1669983.9726826 (kcal/mol)  
Core-Core Interaction = 1508298.1801298 (kcal/mol)  
Heat of Formation = -295.2962348 (kcal/mol)  
Gradient = 0.0102894 (kcal/mol/Ang)

Energy values obtained from AM1 calculations for compound **32**.

### **<sup>1</sup>C<sub>4</sub> conformation**

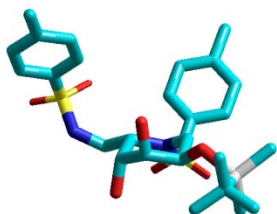

HyperChem

Single Point, SemiEmpirical, molecule = Compound 32 1C4 conformation

AM1

Convergence limit = 0.0100000 Iteration limit = 50

Accelerate convergence = YES

RHF Calculation:

Singlet state calculation

Number of electrons = 212

Number of Double Occupied Levels = 106

Charge on the System = 0

Total Orbitals = 192

Starting AM1 calculation with 192 orbitals

Iteration = 1 Difference = 35882.05626

Iteration = 2 Difference = 47896.12031

Iteration = 3 Difference = 246674.74739

Iteration = 4 Difference = 39465.29020

Iteration = 5 Difference = 24757.16130

Iteration = 6 Difference = 23356.55910

Iteration = 7 Difference = 21230.43919

Iteration = 8 Difference = 20233.28452

Iteration = 9 Difference = 19015.86260

Iteration = 10 Difference = 17722.81406

Iteration = 11 Difference = 15976.78819

Iteration = 12 Difference = 15122.48442

Iteration = 13 Difference = 13740.20199

Iteration = 14 Difference = 12094.50406

Iteration = 15 Difference = 11561.74809

Iteration = 16 Difference = 8861.09109

Iteration = 17 Difference = 8733.14379

Iteration = 18 Difference = 11577.03369

Iteration = 19 Difference = 835.28683

Iteration = 20 Difference = 3373.33826

Iteration = 21 Difference = 3708.87434  
Iteration = 22 Difference = 81.68277  
Iteration = 23 Difference = 11249.76007  
Iteration = 24 Difference = 6180.56858  
Iteration = 25 Difference = 862.55992  
Iteration = 26 Difference = 1596.83757  
Iteration = 27 Difference = 1080.21784  
Iteration = 28 Difference = 1190.50429  
Iteration = 29 Difference = 1356.58515  
Iteration = 30 Difference = 1157.46406  
Iteration = 31 Difference = 409.89978  
Iteration = 32 Difference = 379.20132  
Iteration = 33 Difference = 274.51429  
Iteration = 34 Difference = 86.31133  
Iteration = 35 Difference = 116.91906  
Iteration = 36 Difference = 124.88352  
Iteration = 37 Difference = 54.36405  
Iteration = 38 Difference = 31.71172  
Iteration = 39 Difference = 33.62510  
Iteration = 40 Difference = 35.59051  
Iteration = 41 Difference = 10.33701  
Iteration = 42 Difference = 0.03794  
Iteration = 43 Difference = 0.00527  
Energy=-7704.457007 kcal/mol Gradient=0.009610 Symmetry=C1

#### ENERGIES AND GRADIENT

|                        |                               |
|------------------------|-------------------------------|
| Total Energy           | = -161683.6303251 (kcal/mol)  |
| Total Energy           | = -257.659233901 (a.u.)       |
| Binding Energy         | = -7704.4570071 (kcal/mol)    |
| Isolated Atomic Energy | = -153979.1733180 (kcal/mol)  |
| Electronic Energy      | = -1618148.0199115 (kcal/mol) |
| Core-Core Interaction  | = 1456464.3895864 (kcal/mol)  |
| Heat of Formation      | = -293.1340071 (kcal/mol)     |
| Gradient               | = 0.0096105 (kcal/mol/Ang)    |



Energy values obtained from AM1 calculations for compound **32**.

### **<sup>1</sup>C<sub>4</sub> conformation**

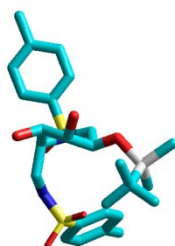

HyperChem

Single Point, SemiEmpirical, molecule = Compound 32 1S5 conformation

AM1

Convergence limit = 0.0100000 Iteration limit = 50

Accelerate convergence = YES

RHF Calculation:

Singlet state calculation

Number of electrons = 212

Number of Double Occupied Levels = 106

Charge on the System = 0

Total Orbitals = 192

Starting AM1 calculation with 192 orbitals

Iteration = 1 Difference = 36036.24087

Iteration = 2 Difference = 15196.74687

Iteration = 3 Difference = 228154.36856

Iteration = 4 Difference = 31195.69228

Iteration = 5 Difference = 21004.10664

Iteration = 6 Difference = 20305.40910

Iteration = 7 Difference = 17397.18187

Iteration = 8 Difference = 17217.51135

Iteration = 9 Difference = 15731.90189

Iteration = 10 Difference = 13930.39957

Iteration = 11 Difference = 13765.70601

Iteration = 12 Difference = 12991.99102

Iteration = 13 Difference = 12058.45547

Iteration = 14 Difference = 9964.73229

Iteration = 15 Difference = 11701.03463

Iteration = 16 Difference = 5801.40067

Iteration = 17 Difference = 6427.89381

Iteration = 18 Difference = 5363.22110

Iteration = 19 Difference = 3179.34864

Iteration = 20 Difference = 2146.67160

Iteration = 21 Difference = 5262.96960

Iteration = 22 Difference = 1276.17816  
Iteration = 23 Difference = 9562.13163  
Iteration = 24 Difference = 5946.92328  
Iteration = 25 Difference = 1812.61608  
Iteration = 26 Difference = 999.28003  
Iteration = 27 Difference = 726.59633  
Iteration = 28 Difference = 233.16549  
Iteration = 29 Difference = 535.17397  
Iteration = 30 Difference = 525.38228  
Iteration = 31 Difference = 136.27437  
Iteration = 32 Difference = 241.47407  
Iteration = 33 Difference = 246.71677  
Iteration = 34 Difference = 88.53233  
Iteration = 35 Difference = 112.14821  
Iteration = 36 Difference = 96.98164  
Iteration = 37 Difference = 62.83556  
Iteration = 38 Difference = 62.03685  
Iteration = 39 Difference = 81.80112  
Iteration = 40 Difference = 13.57128  
Iteration = 41 Difference = 3.02493  
Iteration = 42 Difference = 0.02673  
Iteration = 43 Difference = 0.00615  
Energy=-7709.077550 kcal/mol Gradient=0.011053 Symmetry=C1

#### ENERGIES AND GRADIENT

Total Energy = -161688.2508683 (kcal/mol)  
Total Energy = -257.666597205 (a.u.)  
Binding Energy = -7709.0775503 (kcal/mol)  
Isolated Atomic Energy = -153979.1733180 (kcal/mol)  
Electronic Energy = -1670049.1733703 (kcal/mol)  
Core-Core Interaction = 1508360.9225020 (kcal/mol)  
Heat of Formation = -297.7545503 (kcal/mol)  
Gradient = 0.0110525 (kcal/mol/Ang)
